# Supplementary material for: Tracking Ideal Varieties and Cropping Techniques for Agroecological Weed Management: A Simulation-Based Study on Pea
Source: Front Plant Sci. 2022 Apr 4;13:809056. doi: 10.3389/fpls.2022.809056 (PMC9014269; doi:10.3389/fpls.2022.809056)
Supplement: Supplementary file 3 [file Data_Sheet_3.xlsx]

## Sheet: E.1 - R2
Table E.1.1. Variability in weed (dis)services indicators explained by simulation factors. Number of variables and partial R² from classification and regression trees, run separately on cropping systems including spring vs winter pea and considering either only years with pea or averages over all simulated years. The agroecology profile aggregates potential yield, yield loss, herbicide use intens…
Type of pea variety	Scale	Evaluation criteria	Cropping system performance indicator						Performance profile
			Potential yield	Actual yield	Yield loss	Field infestation	Bee food	Species richness	Production profile (potential yield, yield loss score)	Integrated Management profile (potential yield, yield loss score, herbicide use)	Agroecology profile (potential yield, yield loss score, herbicide use, bee food offer)	Integrated Management profile (actual yield, herbicide use)	Agroecology profile (actual yield, herbicide use, bee food offer)
Spring	Year with pea	Explained variability (R²)	0.77	0.64	0.54	0.61	0.4	0.44	0.6	0.72	0.65	0.8	0.7
		Pea parameters	47	44	45	55	56	34	44	30	29	24	8
		Pea techniques	12	21	19	27	26	18	21	11	13	15	19
		Other-crop techniques	27	65	58	83	86	73	42	21	20	18	21
		Surrogates - Pea parameters	39	38	38	48	49	29	38	25	25	19	4
		Pea techniques	5	5	5	11	12	7	6	1	1	4	5
		Other-crop techniques	23	36	21	42	41	42	23	3	3	5	8
		Partial R² - Pea parameters	0.717077	0.3584	0.111351	0.0296491	0.0126298	0.0104294	0.0911435	0.137538	0.111379	0.186015	0.138399
		Pea techniques	0.0390699	0.135365	0.222451	0.257987	0.114357	0.145097	0.17413	0.242055	0.220568	0.303314	0.283885
		Other-crop techniques	0.0138529	0.122508	0.137057	0.256776	0.190087	0.119495	0.317456	0.283349	0.253634	0.280367	0.235801
		Situation	0	0.0237277	0.0691408	0.0655876	0.0829265	0.164978	0.0172701	0.0570589	0.0644182	0.030304	0.041915
Spring	Rotation	Explained variability (R²)	0.83	0.78	0.77	0.81	0.71	0.75	0.73	0.77	0.69	0.85	0.73
		Pea parameters	41	25	36	50	49	56	8	27	55	40	61
		Pea techniques	14	23	37	29	35	23	33	23	17	17	20
		Other-crop techniques	34	66	92	77	80	64	85	66	60	36	74
		Surrogates - Pea parameters	35	22	29	42	44	48	5	16	48	32	50
		Pea techniques	3	4	13	17	7	9	9	9	3	6	6
		Other-crop techniques	7	13	33	25	16	18	33	32	11	14	31
		Partial R² - Pea parameters	0.423035	0.224838	0.0288581	0.0390341	0.0195769	0.0274627	0.0204049	0.101939	0.038578	0.106149	0.0770283
		Pea techniques	0.0412758	0.170262	0.168858	0.129776	0.14573	0.0579044	0.1886	0.158809	0.131866	0.251067	0.188964
		Other-crop techniques	0.208588	0.326256	0.392505	0.44601	0.374883	0.330931	0.515444	0.479019	0.497646	0.457183	0.44596
		Situation	0.157102	0.0586435	0.179779	0.19518	0.16981	0.333702	0.00555099	0.0302327	0.0219095	0.0356011	0.0180477
Winter	Year with pea	Explained variability (R²)	0.7	0.57	0.56	0.49	0.37	0.42	0.55	0.75	0.69	0.83	0.75
		Pea parameters	66	55	22	36	12	56	54	57	75	26	32
		Pea techniques	14	25	20	28	24	18	15	7	9	9	10
		Other-crop techniques	19	58	46	60	60	78	27	10	11	25	25
		Surrogates - Pea parameters	53	45	13	27	7	43	45	42	59	18	24
		Pea techniques	7	8	3	7	8	3	2	1	2	3	3
		Other-crop techniques	10	29	7	23	17	42	7	3	3	20	20
		Partial R² - Pea parameters	0.604614	0.266519	0.177739	0.0223678	0.010183	0.0237243	0.0947312	0.314406	0.284276	0.222565	0.183529
		Pea techniques	0.0722538	0.137577	0.133728	0.113559	0.110112	0.113853	0.206396	0.157656	0.165652	0.342824	0.341128
		Other-crop techniques	0.0231319	0.099657	0.120898	0.250959	0.162237	0.120164	0.212387	0.192253	0.178679	0.169514	0.143761
		Situation	0	0.0662469	0.127635	0.103114	0.0874679	0.162259	0.036486	0.0856844	0.0613933	0.0950958	0.081582
Winter	Rotation	Explained variability (R²)	0.78	0.73	0.75	0.75	0.66	0.71	0.67	0.73	0.63	0.81	0.68
		Pea parameters	46	36	60	44	40	35	65	22	23	27	23
		Pea techniques	17	31	24	21	34	29	27	19	15	10	12
		Other-crop techniques	40	70	72	74	85	71	81	42	46	21	34
		Surrogates - Pea parameters	35	27	43	32	23	22	55	10	12	17	15
		Pea techniques	1	8	7	2	9	11	5	11	6	3	5
		Other-crop techniques	9	15	16	16	32	20	23	16	16	6	6
		Partial R² - Pea parameters	0.303348	0.138653	0.0631303	0.0353956	0.0433515	0.0376134	0.054997	0.110652	0.0587102	0.159391	0.0824312
		Pea techniques	0.0756571	0.118294	0.062706	0.0633242	0.126555	0.0669015	0.132429	0.134937	0.15854	0.119312	0.112036
		Other-crop techniques	0.297736	0.289486	0.367919	0.447565	0.33519	0.287006	0.476099	0.443529	0.370832	0.485425	0.446913
		Situation	0.103258	0.183566	0.256244	0.203716	0.154903	0.318479	0.00647515	0.0408824	0.0419181	0.0458719	0.0386198
		Table E.1.2. Proportion of surrogate variables among splitting variables of classification and regression trees used to analyse weed (dis)service indicators. Only surrogates with a 100% agree value were considered, i.e. whose use would result in exactly the same split as the main splitting variable of each tree node
		Simulation factors	Cropping system performance indicator						Performance profile
			Potential yield	Actual yield	Yield loss	Field infestation	Bee food	Species richness	Production	Integrated Management	Agroecology	Integrated Management profile (actual yield, herbicide use)	Agroecology profile (actual yield, herbicide use, bee food offer)
		A. Spring pea - Years with pea
		Pea parameters	0.829787	0.863636	0.844444	0.872727	0.875	0.852941	0.863636	0.833333	0.862069	0.791667	0.5
		Pea techniques	0.416667	0.238095	0.263158	0.407407	0.461538	0.388889	0.285714	0.0909091	0.0769231	0.266667	0.263158
		Other-crop techniques	0.851852	0.553846	0.362069	0.506024	0.476744	0.575342	0.547619	0.142857	0.15	0.277778	0.380952
		B. Spring pea - Average over rotation
		Pea parameters	0.853659	0.88	0.805556	0.84	0.897959	0.857143	0.625	0.592593	0.872727	0.8	0.819672
		Pea techniques	0.214286	0.173913	0.351351	0.586207	0.2	0.391304	0.272727	0.391304	0.176471	0.352941	0.3
		Other-crop techniques	0.205882	0.19697	0.358696	0.324675	0.2	0.28125	0.388235	0.484848	0.183333	0.388889	0.418919
		C. Winter pea - Years with pea
		Pea parameters	0.80303	0.818182	0.590909	0.75	0.583333	0.767857	0.833333	0.736842	0.786667	0.692308	0.75
		Pea techniques	0.5	0.32	0.15	0.25	0.333333	0.166667	0.133333	0.142857	0.222222	0.333333	0.3
		Other-crop techniques	0.526316	0.5	0.152174	0.383333	0.283333	0.538462	0.259259	0.3	0.272727	0.8	0.8
		D. Winter pea - Average over rotation
		Pea parameters	0.76087	0.75	0.716667	0.727273	0.575	0.628571	0.846154	0.454545	0.521739	0.62963	0.652174
		Pea techniques	0.0588235	0.258065	0.291667	0.0952381	0.264706	0.37931	0.185185	0.578947	0.4	0.3	0.416667
		Other-crop techniques	0.225	0.214286	0.222222	0.216216	0.376471	0.28169	0.283951	0.380952	0.347826	0.285714	0.176471
		Table E.1.3. Summary of proprotions of surrogate variables					0.95
			min	max	median	mean	quantile
		Pea parameters	0.454545	0.897959	0.795833	0.754742	0.874886
		Pea techniques	0.0588235	0.586207	0.279221	0.2875	0.498077
		Other-crop techniques	0.142857	0.851852	0.336251	0.365527	0.788767

## Sheet: E.2 - BestPeaParameters
Table E.2. The key pea parameters driving potential yield and weed (dys)services in pea and in rotations including pea. The ten most influential parameters per pea-variety type, analysis scale and weed-impact indicator based on relative variable importance (VIP) in classification and regression trees analysing weed (dis)service indicators as a function of situation, pea parameters, pea management…																													max	0.265205	0.265205
Type of pea variety	Scale	PotentialEnergyYield			ActualEnergyYield			GrainYieldLoss			FieldInfestation			BeeFood			SpeciesRichness			Production profile (potential yield, yield loss score)			Integrated Management profile (potential yield, yield loss score, herbicide use)			Agroecology profile (potential yield, yield loss score, herbicide use, bee food offer)			Integrated Management profile (actual yield, herbicide use)			Agroecology profile (actual yield, herbicide use, bee food offer)
		Variable	VIP_relative	ProbIncreasedIndicator	Variable	VIP_relative	ProbIncreasedIndicator	Variable	VIP_relative	ProbIncreasedIndicator	Variable	VIP_relative	ProbIncreasedIndicator	Variable	VIP_relative	ProbIncreasedIndicator	Variable	VIP_relative	ProbIncreasedIndicator	Variable	VIP_relative	ProbIncreasedIndicator	Variable	VIP_relative	ProbIncreasedIndicator	Variable	VIP_relative	ProbIncreasedIndicator	Variable	VIP_relative	ProbIncreasedIndicator	Variable	VIP_relative	ProbIncreasedIndicator
Spring	Years with pea	PeaFloweringTT	0.265205	1	LBRlate	0.165014	1	WMlate	0.0524325	1	WMmid	0.0125882	1	LBRmid	0.00465305	0.142268	reductionSurface	0.00505759	0.886456	RGR	0.0335423	1	PeaFloweringTT	0.09248	1	PeaFloweringTT	0.0786478	1	PeaFloweringTT	0.10178	1	PeaFloweringTT	0.0713582	1
		WMearly	0.219871	0	WMearly	0.152251	0.0051039	LBRlate	0.0512131	1	mu_HMmid	0.0108388	1	g0	0.0036045	0.177378	C0buried	0.00361406	0	LBRlate	0.027406	1	b_RLHlate	0.0199252	0	b_RLHlate	0.0200322	0	mu_LBRlate	0.0563579	0.962422	b_RLHlate	0.0412614	0
		b_RLHlate	0.215514	0	b_RLHlate	0.150146	0	HMearly	0.0478993	0.543221	mu_LBRmid	0.0108388	1	HMearly	0.0036045	0.822622	shootDiameter	0.00361406	0	PeaFloweringTT	0.0257875	1	b_WMearly	0.0199252	1	b_WMearly	0.0200322	1	WMearly	0.0563579	0.0375784	b_WMearly	0.0412614	1
		b_WMearly	0.215514	1	b_WMearly	0.150146	1	HMmid	0.0351876	1	max_height	0.0104998	0.291503	g50	0.00298257	0	HMmid	0.00288788	0	baseWaterPotential	0.0241535	0.0353261	LBRlate	0.0199252	1	LBRlate	0.0200322	1	b_RLHlate	0.0503493	0	LBRlate	0.0412614	1
		LBRlate	0.215514	1	mu_HMmid	0.150146	1	b_HMmid	0.0348544	0.990373	b_RLHlate	0.00856191	0	baseTempDev	0.00277936	0.882603	mu_HMlate	0.00288788	0	rb	0.0241535	0	mu_HMmid	0.0199252	1	mu_HMmid	0.0200322	1	b_WMearly	0.0503493	1	mu_HMmid	0.0412614	1
		mu_HMmid	0.215514	1	mu_LBRlate	0.150146	1	b_HMearly	0.034049	1	lb	0.00856191	0	shootLength	0.00275111	1	mu_RLHearly	0.00288788	1	se_LA	0.0241535	0	mu_LBRlate	0.0199252	1	mu_LBRlate	0.0200322	1	LBRlate	0.0503493	1	mu_LBRlate	0.0412614	1
		mu_LBRlate	0.215514	1	tPhoto2	0.150146	0	Emax	0.034049	1	g50	0.00796699	0	Emax	0.00252425	0.72888	SLAearly	0.00271768	0.323671	tPhoto1	0.0241535	0	tPhoto2	0.0199252	0	tPhoto2	0.0200322	0	mu_HMmid	0.0503493	1	tPhoto2	0.0412614	0
		tPhoto2	0.215514	0	PeaFloweringTT	0.147189	1	mu_HMmid	0.034049	1	Emax	0.00694642	0.973267	r50	0.00252425	0.72888	betaFineEarth	0.00199313	1	tPhoto3	0.0241535	0	WMearly	0.0199252	0	WMearly	0.0200322	0	tPhoto2	0.0503493	0	WMearly	0.0412614	0
		g0	0.0133712	0.465376	g0	0.0188318	0.233797	mu_LBRearly	0.034049	1	rateWidth	0.00596415	1	rateCyl	0.00252425	0.27112	gb	0.00199313	0	TTflo	0.0241535	0.964674	betaCompacted	0.0162107	0	baseWaterPotential	0.00479504	0	Afila	0.00600863	1
		se_LA	0.0124082	0.673477	reductionDepth	0.0188318	0.233797	mu_LBRmid	0.034049	1	reductionDepth	0.00596415	0	rateDepth	0.00252425	0.72888	mu_WMearly	0.00199313	1	g0	0.0207066	0.438127	betaFineEarth	0.0162107	0	betaCompacted	0.00479504	0	b_HMearly	0.00600863	1
Spring	Rotation	PeaFloweringTT	0.220348	1	tPhoto2	0.111302	0	mu_HMmid	0.0162439	1	PeaFloweringTT	0.0173256	0	PeaFloweringTT	0.00690149	0.0454545	shootLength	0.0101111	0.314286	PeaFloweringTT	0.0139127	0.982897	b_RLHlate	0.0245834	0	LBRlate	0.0139245	1	LBRlate	0.033869	1	reductionDepth	0.0217876	0.0795455
		LBRlate	0.181673	1	b_RLHlate	0.109807	0	mu_LBRmid	0.0162439	1	rateDepth	0.01024	0.904762	tPhoto2	0.00555107	1	PeaFloweringTT	0.00992093	0.0513699	b_RLHlate	0.00327497	0	mu_HMmid	0.0245834	1	tPhoto2	0.0139245	0	Epsi_b	0.029418	0.628571	seedWeight	0.0210292	0.22293
		mu_HMmid	0.181673	1	b_WMearly	0.109807	1	b_HMmid	0.0150387	1	mu_HMmid	0.00917643	1	l50	0.0052166	0.352273	C0surface	0.00895481	0.0779221	b_WMearly	0.00327497	1	b_WMearly	0.0193921	1	mu_HMmid	0.0122655	1	TTcot	0.029418	0.371429	r50	0.0204711	0.542857
		b_RLHlate	0.17956	0	LBRlate	0.109807	1	LBRlate	0.0150387	1	tPhoto2	0.00805299	0	tFrostEarly3	0.00426208	0.791667	betaFineEarth	0.00618007	0.454545	LBRlate	0.00327497	1	tPhoto2	0.0193921	0	t0	0.0114751	0.142857	mu_HMmid	0.0207143	1	rootLength	0.01927	0.970803
		b_WMearly	0.17956	1	mu_HMmid	0.109807	1	WMlate	0.00959418	1	lb	0.00712201	0.159574	b_RLHlate	0.00412673	1	rb	0.00618007	1	mu_HMmid	0.00327497	1	WMearly	0.0193921	0	tPhoto3	0.0114751	0.142857	WMlate	0.0187124	1	rateWidth	0.019117	0.521569
		mu_LBRlate	0.17956	1	mu_LBRlate	0.109807	1	WMmid	0.00959418	1	max_height	0.00712201	0.159574	b_WMearly	0.00412673	0	betaCompacted	0.0059948	0	mu_LBRlate	0.00327497	1	reductionDepth	0.0174855	0.224719	reductionDepth	0.0105282	0	PeaFloweringTT	0.0171876	1	WMmid	0.0154194	0.536122
		tPhoto2	0.17956	0	WMearly	0.109807	0	HMmid	0.00953638	1	b_RLHlate	0.00693194	0	LBRlate	0.00412673	0	nonDormantMinimum.YOUNG_SEEDS.	0.0059948	0	tPhoto2	0.00327497	0	seedWeight	0.0174855	1	b_RLHearly	0.0100883	1	baseTempDev	0.0162634	1	shootLength	0.0147733	0.244755
		WMearly	0.17956	0	PeaFloweringTT	0.0992713	1	RBR	0.00953638	0	b_RLHmid	0.00600735	0.937931	mu_HMmid	0.00412673	0	seedWeight	0.0059948	0	WMearly	0.00327497	0	PeaFloweringTT	0.0162148	1	WMmid	0.0100828	1	baseTempGerm	0.0162634	0	RGR	0.0135722	0.171429
		RGR	0.0068667	0.739927	baseTempDev	0.00149528	0	b_HMearly	0.00838896	1	t0	0.00600735	0.062069	mu_LBRlate	0.00412673	0	Epsi_b	0.00561627	0				WMmid	0.0143438	1	SLAmid	0.00943925	0	betaCompacted	0.0162634	0	Emax	0.0128611	0.551867
		betaCompacted	0.00615554	0.238655	baseWaterPotential	0.00149528	1	Emax	0.00838896	1	baseTempDev	0.00588495	1	WMearly	0.00412673	1	baseWaterPotential	0.00492823	0				betaCompacted	0.0141132	0	mu_LBRlate	0.00838361	1	g50	0.0162634	0	b_WMmid	0.0122588	0.5
Winter	Years with pea	PeaFloweringTT	0.181156	0.914522	b_HMmid	0.137599	0.0115381	darknessReduction.YOUNG_SEEDS.	0.106349	0	WMmid	0.00419518	1	LBRlate	0.00350031	0.625	mu_LBRearly	0.00453218	0.684211	PeaFloweringTT	0.0276818	0.882703	PeaFloweringTT	0.0616328	1	PeaFloweringTT	0.0532453	1	PeaFloweringTT	0.045958	1	PeaFloweringTT	0.0433748	1
		mu_WMlate	0.158854	0	TTplant	0.0481785	0	Emax	0.106349	1	Epsi_b	0.00397051	1	r50	0.00323766	1	mu_HMlate	0.00451594	0.235585	seedWeight	0.0162862	1	seedWeight	0.0473015	0.883412	TTcot	0.0420464	0.277937	mu_LBRmid	0.0405455	1	TTplant	0.0328422	0.170907
		RLHearly	0.0570383	0	PeaFloweringTT	0.022845	1	g0	0.106349	0	baseTempDev	0.00305723	0	seedWeight	0.00323766	1	max_width	0.00420288	1	TTmat	0.0162603	0.690407	baseWaterPotential	0.0425183	0.71841	LA0	0.0395802	0.400424	TTplant	0.0376326	0.139894	mu_LBRmid	0.0317682	1
		TTcot	0.0563733	0.381813	r50	0.0221174	0.276885	gamma	0.106349	0	baseTempGerm	0.00305723	0	shootLength	0.00323766	1	b_RLHlate	0.0041889	0.918819	se_LA	0.0158454	0	betaFineEarth	0.0425183	0.28159	rootLength	0.039475	0.545947	rateDepth	0.0360735	0	rateDepth	0.0291431	0
		reductionDepth	0.0550639	0	baseWaterPotential	0.0178805	1	max_height	0.106349	0	baseWaterPotential	0.00305723	1	TTflo	0.00261266	1	tFrostMid2	0.0041889	0.918819	b_RLHmid	0.0149722	0.646797	rb	0.0425183	0.804479	TTplant	0.0378541	0	rateWidth	0.0360735	0	rateWidth	0.0291431	0
		mu_SLAlate	0.0548484	0.586108	beta	0.0178805	0	rb	0.106349	1	l50	0.00305723	1	SLAearly	0.00150228	0	r50	0.0038383	0.823425	TTflo	0.0139804	0.374476	reductionSurface	0.0425183	0.28159	reductionDepth	0.0378206	0.368624	b_HMmid	0.0343946	0	b_HMmid	0.0263699	0
		max_width	0.0547001	0.598772	C0buried	0.0178805	0.303561	shootDiameter	0.106349	1	mu_RLHearly	0.00305723	1	tFrostMid3	0.00150228	1	shootLength	0.0038383	0.823425	TTplant	0.0121842	0.188313	shootDiameter	0.0425183	0.804479	shootLength	0.0378206	0.631376	b_WMmid	0.0244264	1	LA0	0.0197737	0.415575
		b_RLHlate	0.0540031	0.689265	C0surface	0.0178805	0.303561	mu_LBRmid	0.0299133	1	rb	0.00305723	1	tPhoto4	0.00150228	0	PeaFloweringTT	0.00379594	1	RGR	0.0102727	0.749041	TTcot	0.0364519	0.343888	baseTempGerm	0.0330174	0.669557	mu_WMlate	0.0139931	0	b_WMmid	0.0188029	1
		TTflo	0.0516426	0.532991	g0	0.0178805	0	mu_WMmid	0.0144291	1	reductionSurface	0.00305723	0	RGR	0.00149908	1	mu_RLHlate	0.00334999	0.222809	TTcot	0.0102727	0.250959	max_width	0.0337616	0.576015	baseWaterPotential	0.0330174	0.669557	mu_SLAlate	0.013203	1	WMmid	0.0130952	1
		shootLength	0.0502957	0.517142	l50	0.0178805	0.696439	b_WMmid	0.0129103	1	shootDiameter	0.00305723	1	tFrostEarly2	0.00149908	1	mu_LBRlate	0.00327459	1	beta	0.0102049	0.225649	TTmat	0.0337616	0.423985	betaCompacted	0.0330174	0.770558	RLHearly	0.013203	0	mu_LBRearly	0.010257	0
Winter	Rotation	PeaFloweringTT	0.10293	1	rateDepth	0.0552979	0.156613	rb	0.0138368	1	PeaFloweringTT	0.00594139	0	TTplant	0.010295	1	mu_LBRearly	0.0101173	0	PeaFloweringTT	0.0167682	0.316374	TTmat	0.0157326	0	LBRearly	0.00860993	0.469432	rateDepth	0.0491217	0.0676388	max_height	0.0209041	0
		mu_WMlate	0.0965722	0.0137097	rateWidth	0.0515226	0	max_height	0.0133167	0.309735	RLHearly	0.00577362	0.34585	mu_RLHmid	0.00513903	0.346939	b_HMearly	0.00884548	0	shootLength	0.0112557	0.604639	RLHearly	0.0107918	0	Emax	0.00742605	1	rateWidth	0.0491217	0.0676388	b_HMlate	0.0169148	1
		RLHearly	0.0368755	0	b_WMmid	0.0188278	1	darknessReduction.YOUNG_SEEDS.	0.0107406	0	LBRlate	0.00448298	1	max_height	0.00421921	0.471831	b_HMmid	0.00884548	0	RGR	0.00991768	0.852797	PeaFloweringTT	0.00863267	0.19467	mu_SLAearly	0.00489978	0	k_coef	0.0335337	0	HMmid	0.0169148	1
		max_width	0.035568	0.33184	PeaFloweringTT	0.015845	0.803832	gamma	0.0107406	0.253623	RLHmid	0.00357175	0	LBRlate	0.00385474	0	b_RLHearly	0.00824009	0	seedWeight	0.00969598	1	mu_RLHmid	0.00750818	1	tFrostLate1	0.00489978	0	max_width	0.0335337	0	SLAlate	0.0169148	1
		mu_LBRmid	0.035237	1	reductionDepth	0.0140567	0.388134	g0	0.0102477	0.0388802	se_LA	0.00357175	1	mu_WMlate	0.00385301	0.929134	mu_SLAmid	0.00753114	1	tPhoto2	0.00940371	0.216194	tFrostMid2	0.00750818	0	tFrostMid1	0.00489978	1	rateCyl	0.0335337	0	tFrostLate2	0.0169148	0
		b_RLHearly	0.0315122	0.258873	RGR	0.0114106	0.842538	WMmid	0.0102284	1	SLAearly	0.00357175	1	gamma	0.00368463	1	WMmid	0.00705267	0	beta	0.00814859	0	LBRlate	0.00587345	1	mu_HMearly	0.00483364	0	RGR	0.0335337	1	tFrostMid2	0.0169148	1
		shootLength	0.0284107	0.747494	b_HMmid	0.0110274	0	Emax	0.00933803	1	tPhoto1	0.00357175	1	WinterAnnual	0.00313954	0	b_WMmid	0.00610014	0	g0	0.00814859	0.336323	tFrostMid3	0.00587345	0	tPhoto1	0.00449297	0	se_LA	0.0335337	0	WinterAnnual	0.0169148	0
		TTflo	0.0284107	0.252506	seedWeight	0.00912759	1	shootDiameter	0.00933803	1	tPhoto4	0.00357175	1	SLAearly	0.00312294	0	baseTempDev	0.00610014	1	l50	0.00814859	0.336323	b_RLHlate	0.00436538	0	b_HMmid	0.00391793	0	seedWeight	0.0335337	1	mu_WMlate	0.01395	0
		mu_LBRlate	0.0280113	1	shootLength	0.00912759	0.690868	tFrostMid3	0.00811916	0	tFrostMid3	0.00323972	0	RLHmid	0.00284347	0.5625	C0buried	0.00610014	1	lb	0.00814859	0.336323	mu_WMmid	0.00436538	1	reductionDepth	0.00388991	1	shootLength	0.0335337	1	b_HMmid	0.0128978	0
		tPhoto4	0.0279521	0.0382268	Epsi_b	0.00648156	1	b_WMmid	0.0068243	1	shootLength	0.00268228	0.588235	HMearly	0.00282526	0	HMearly	0.00610014	1	rb	0.00814859	1	b_WMmid	0.00428262	1	betaCompacted	0.00252627	1	SpringAnnual	0.0335337	1	RLHmid	0.0115499	1

## Sheet: E.3 - BestPeaTechniques
Table E.3. The key pea techniques driving potential yield and weed (dys)services in pea and in rotations including pea. The ten most influential techniques per pea-variety type, analysis scale and weed-impact indicator based on relative variable importance (VIP) in classification and regression trees analysing weed (dis)service indicators as a function of situation, pea parameters, pea management…																										max	0.265205	0.136264
Type of pea variety	Scale	PotentialEnergyYield			ActualEnergyYield			GrainYieldLoss			FieldInfestation			BeeFood			SpeciesRichness			Production profile (potential yield, yield loss score)			Integrated Management profile (potential yield, yield loss score, herbicide use)			Agroecology profile (potential yield, yield loss score, herbicide use, bee food offer)			Integrated Management profile (actual yield, herbicide use)			Agroecology profile (actual yield, herbicide use, bee food offer)
		Variable	VIP_relative	ProbIncreasedIndicator	Variable	VIP_relative	ProbIncreasedIndicator	Variable	VIP_relative	ProbIncreasedIndicator	Variable	VIP_relative	ProbIncreasedIndicator	Variable	VIP_relative	ProbIncreasedIndicator	Variable	VIP_relative	ProbIncreasedIndicator	Variable	VIP_relative	ProbIncreasedIndicator	Variable	VIP_relative	ProbIncreasedIndicator	Variable	VIP_relative	ProbIncreasedIndicator	Variable	VIP_relative	ProbIncreasedIndicator	Variable	VIP_relative	ProbIncreasedIndicator
Spring	Years with pea	SowingDensity.seeds.m2._POIS	0.00924331	1	timeLastTillSow_POIS	0.0636404	0	timeLastTillSow_POIS	0.0855037	0	MeanTillageDepth_POIS	0.0666681	0.244911	nbSuperficialTillage_POIS	0.0476236	0	MaxTillageDepth_POIS	0.0930058	0.993649	timeLastTillSow_POIS	0.0288643	0	nbHerbicides_POIS	0.0745473	0	nbHerbicides_POIS	0.073404	0	timeLastTillSow_POIS	0.0646959	0	nbHerbicides_POIS	0.0538868	0
		Interrow.cm._POIS	0.00633118	0	PrimaryCropSowingDate_POIS	0.0155697	0	MaxTillageDepth_POIS	0.0255066	0.169505	timeLastTillSow_POIS	0.0603118	0	MeanTillageDepth_POIS	0.00935987	0.925833	nbSuperficialTillage_POIS	0.011624	1	PrimaryCropSowingDate_POIS	0.0203509	0.25604	timeLastTillSow_POIS	0.0599469	0	timeLastTillSow_POIS	0.0577895	0.0607163	nbHerbicides_POIS	0.0599639	0	timeLastTillSow_POIS	0.0501653	0
		PrimaryCropSowingDate_POIS	0.00492688	0.0102756	MeanTillageDepth_POIS	0.010537	0.930964	PrimaryCropSowingDate_POIS	0.0225777	0.0195369	MaxTillageDepth_POIS	0.0589921	0.0640716	timeLastTillSow_POIS	0.00860543	0.858137	PrimaryCropSowingDate_POIS	0.0102137	0.967504	MeanTillageDepth_POIS	0.0136077	0.230083	PrimaryCropSowingDate_POIS	0.0216753	0	timeLastMechWeedingHarvest_POIS	0.0179562	0	EfficacyDicot._POIS	0.0370174	1	EfficacyDicot._POIS	0.0383013	0.187396
		timeHarvest1stPlough_POIS	0.0030228	1	nbSuperficialTillage_POIS	0.00940757	1	MeanTillageDepth_POIS	0.0217576	0.219035	timeHarvest1stTill_POIS	0.0243323	0.0947712	Frequency_POIS	0.00757274	0.820778	MeanTillageDepth_POIS	0.00928517	0.946224	timeLastHerbicideHarvest_POIS	0.0127077	1	SowingDepth.cm._POIS	0.0173056	0.375078	meanMechWeedSpeed.km.h._POIS	0.0109604	1	nbMultiHerbicides_POIS	0.0370174	1	nbMultiHerbicides_POIS	0.0317886	1
		timeLastRollSow_POIS	0.0029787	0	MaxTillageDepth_POIS	0.00835465	0.215355	FreqLeavingCutCropBiomass_POIS	0.0077769	1	PrimaryCropSowingDate_POIS	0.0229241	0.0138542	timeHarvest1stTill_POIS	0.00694121	0.895752	timeLastHerbicideHarvest_POIS	0.00514889	0.956348	winterTillage_POIS	0.0115109	1	timeLastMechWeedingHarvest_POIS	0.0168213	0	PrimaryCropSowingDate_POIS	0.00992621	0	propSpeciesMortSup80_POIS	0.0370174	1	propSpeciesMortSup80_POIS	0.0317886	1
		MaxTillageDepth_POIS	0.00141683	0	winterTillage_POIS	0.00812482	1	nbResidueShredding.Broyage._POIS	0.0077769	1	FreqLeavingCutCropBiomass_POIS	0.00908147	0.407608	timeLastHerbicideHarvest_POIS	0.00675721	0.428673	timeLastTillSow_POIS	0.00465386	0	nbMechWeeding_POIS	0.0114389	1	SowingDensity.seeds.m2._POIS	0.0130822	1	timeSow1stHerbicide_POIS	0.00887372	0	propSpeciesMortSup90_POIS	0.0370174	1	propSpeciesMortSup90_POIS	0.0317886	1
		nbMechWeeding_POIS	0.00141683	0	Frequency_POIS	0.00629847	0	nbHerbDicotSup75_POIS	0.00699193	1	nbResidueShredding.Broyage._POIS	0.00908147	0.407608	SowingDensity.seeds.m2._POIS	0.0058932	0.937398	SowingDensity.seeds.m2._POIS	0.00433428	0.589026	summerPlough_POIS	0.0114389	1	RowSowing.1or0._POIS	0.0117082	1	MaxTillageDepth_POIS	0.00841606	1	timeSow1stHerbicide_POIS	0.0324021	1	timeSow1stHerbicide_POIS	0.0303794	0.21259
		timeLastPloughSow_POIS	0.00135808	1	SowingDensity.seeds.m2._POIS	0.00563707	1	nbMechWeeding_POIS	0.00630744	1	nbSuperficialTillage_POIS	0.00557186	0.819457	SowingDepth.cm._POIS	0.00574863	0.851521	summerTillage_POIS	0.0033946	0.935339	timeLastPloughSow_POIS	0.0114389	1	meanMechWeedSpeed.km.h._POIS	0.0102653	1	FreqLeavingCutCropBiomass_POIS	0.00628824	1	winterTillage_POIS	0.0285918	0	PrimaryCropSowingDate_POIS	0.0207934	0
		timeLastTillSow_POIS	0.00135808	1	timeHarvest1stTill_POIS	0.00450167	0	timeHarvest1stTill_POIS	0.00526665	0.552795	SowingDensity.seeds.m2._POIS	0.00493936	0.548736	timeLastIrrigationHarvest_POIS	0.00439038	0	nbPloughing_POIS	0.00266348	1	winterPlough_POIS	0.0114389	0	timeSow1stHerbicide_POIS	0.00909437	0	nbResidueShredding.Broyage._POIS	0.00628824	1	nbRolling_POIS	0.0181753	1	MaxTillageDepth_POIS	0.0167069	0.180357
		MeanTillageDepth_POIS	0.00127053	0	timeHarvest1stPlough_POIS	0.00412474	0	winterTillage_POIS	0.00518216	0.903096	timeSow1stMechWeeding_POIS	0.00469267	0.0203931	PrimaryCropSowingDate_POIS	0.00385384	1	SowingDepth.cm._POIS	0.00266348	1	SowingDensity.seeds.m2._POIS	0.00960034	0.923502	MaxTillageDepth_POIS	0.00848631	1	SowingDensity.seeds.m2._POIS	0.00562724	1	timeLastHerbicideHarvest_POIS	0.015408	1	nbRolling_POIS	0.0139116	1
Spring	Rotation	Interrow.cm._POIS	0.00900384	0.165179	timeLastTillSow_POIS	0.0731651	0	timeLastTillSow_POIS	0.050992	0.0331825	timeLastTillSow_POIS	0.0532203	0	SowingDensity.seeds.m2._POIS	0.0172628	0.463054	Frequency_POIS	0.00970549	1	PrimaryCropSowingDate_POIS	0.0252906	0	MaxTillageDepth_POIS	0.0354169	0	timeLastTillSow_POIS	0.0283209	0	timeLastTillSow_POIS	0.0591814	0	SowingDensity.seeds.m2._POIS	0.0299956	0.237705
		SowingDensity.seeds.m2._POIS	0.0054132	1	PrimaryCropSowingDate_POIS	0.0257699	0.0347297	timeHarvest1stTill_POIS	0.0186009	0.128535	Frequency_POIS	0.0264408	1	timeHarvest1stTill_POIS	0.0153388	0.908881	timeSow1stHerbicide_POIS	0.00893182	0.424847	Frequency_POIS	0.0225717	0.770784	timeLastTillSow_POIS	0.0266364	0	nbSuperficialTillage_POIS	0.0150197	0.814815	MaxTillageDepth_POIS	0.0285263	0.583333	timeLastTillSow_POIS	0.0253259	0.377953
		MaxTillageDepth_POIS	0.00481223	0.681818	MaxTillageDepth_POIS	0.00927141	0.462665	PrimaryCropSowingDate_POIS	0.017191	0	SowingDensity.seeds.m2._POIS	0.022393	0.669323	PrimaryCropSowingDate_POIS	0.0116701	0.403875	nbSystemicHerbicides_POIS	0.00861884	0.26178	MeanTillageDepth_POIS	0.0195789	0.369014	timeSow1stMechWeeding_POIS	0.0213286	0	summerTillage_POIS	0.0145001	0.814815	PrimaryCropSowingDate_POIS	0.0262756	0	timeSow1stHerbicide_POIS	0.0198497	0.670455
		bRolling_POIS	0.00400805	1	winterTillage_POIS	0.00904537	1	MeanTillageDepth_POIS	0.0165342	0.431818	MeanTillageDepth_POIS	0.015641	0.109547	nbHerbDicotSup50_POIS	0.0104346	0.791139	SowingDensity.seeds.m2._POIS	0.00722412	0.810345	EfficacyMonocot_POIS	0.0122236	0.441441	MeanTillageDepth_POIS	0.0208934	0	SowingDensity.seeds.m2._POIS	0.0131738	0.113636	nbSuperficialTillage_POIS	0.025835	1	SowingDepth.cm._POIS	0.0170987	0.888889
		timeLastMechWeedingHarvest_POIS	0.00396309	1	Frequency_POIS	0.00723944	1	MaxTillageDepth_POIS	0.0122943	0.309091	winterPlough_POIS	0.00968264	0	EfficacyDicot._POIS	0.0100568	0.344828	timeHarvest1stTill_POIS	0.00653973	0.986339	SowingDepth.cm._POIS	0.0119938	0	Frequency_POIS	0.0193211	0.30203	nbHerbDicotSup50_POIS	0.0126084	0.780488	MeanTillageDepth_POIS	0.025734	1	nbMechWeeding_POIS	0.0163006	0.666667
		timeHarvest1stRoll_POIS	0.00368896	0	timeSow1stHerbicide_POIS	0.00576308	0.37046	meanMechWeedSpeed.km.h._POIS	0.0092948	0.908397	timeHarvest1stTill_POIS	0.00637812	0.176849	MaxTillageDepth_POIS	0.00777669	1	MeanTillageDepth_POIS	0.00608312	0.864811	meanMechWeedSpeed.km.h._POIS	0.0117037	0.94	timeHarvest1stTill_POIS	0.0147853	0.0837696	MaxTillageDepth_POIS	0.0123057	0.9	EfficacyMonocot_POIS	0.0218709	1	PrimaryCropSowingDate_POIS	0.0158207	0.494681
		propWeededArea_POIS	0.00258388	0.36036	FreqLeavingCutCropBiomass_POIS	0.00522108	1	Frequency_POIS	0.00670863	0	timeSow1stHerbicide_POIS	0.00520383	0.618834	propWeededArea_POIS	0.00748449	0.654822	nbSuperficialTillage_POIS	0.00399443	1	timeHarvest1stTill_POIS	0.0104937	0	FreqLeavingCutCropBiomass_POIS	0.0128514	0	SowingDepth.cm._POIS	0.0106224	0	EfficacyDicot._POIS	0.0162634	0	nbSuperficialTillage_POIS	0.0126476	1
		MeanTillageDepth_POIS	0.00235504	1	nbResidueShredding.Broyage._POIS	0.00522108	1	propWeededArea_POIS	0.00663019	1	PrimaryCropSowingDate_POIS	0.00487365	0.436275	timeLastTillSow_POIS	0.00718655	0.967105	PrimaryCropSowingDate_POIS	0.00381369	0.807692	timeLastHerbicideHarvest_POIS	0.00913542	0.925676	nbPseudorootHerbicides_POIS	0.0128514	0	Frequency_POIS	0.0101112	1	nbHerbDicotSup50_POIS	0.0162634	0	nbPloughing_POIS	0.00970053	1
		nbPloughing_POIS	0.00235504	1	timeSow1stMechWeeding_POIS	0.00462022	0	timeSow1stMechWeeding_POIS	0.00504817	0	nbMultiHerbicides_POIS	0.00380413	0.434783	MeanTillageDepth_POIS	0.00702175	0.246154	summerTillage_POIS	0.0036115	1	timeLastTillSow_POIS	0.00867781	0	nbResidueShredding.Broyage._POIS	0.0128514	0	MeanTillageDepth_POIS	0.00989898	0	nbMultiHerbicides_POIS	0.0162634	0	summerPlough_POIS	0.00970053	1
		winterPlough_POIS	0.00235504	1	SowingDensity.seeds.m2._POIS	0.00397443	1	timeLastRollSow_POIS	0.00450082	0	nbSuperficialTillage_POIS	0.00372763	0.352941	nbSuperficialTillage_POIS	0.00692422	0.047619	timeLastHerbicideHarvest_POIS	0.00330624	1	nbMultiHerbicides_POIS	0.00866313	0.626506	RowSowing.1or0._POIS	0.0128514	0	winterTillage_POIS	0.00989898	0	nbHerbicides_POIS	0.0150502	0	MeanTillageDepth_POIS	0.00920122	0
Winter	Years with pea	Interrow.cm._POIS	0.0324102	0	timeLastTillSow_POIS	0.0478895	0	timeLastTillSow_POIS	0.0574759	0	EfficacyMonocot_POIS	0.0192238	0.993688	MaxTillageDepth_POIS	0.0489926	0.207086	MaxTillageDepth_POIS	0.0674183	0.990197	PrimaryCropSowingDate_POIS	0.0498475	0.897972	nbHerbicides_POIS	0.0818321	0	nbHerbicides_POIS	0.0810524	0	nbHerbicides_POIS	0.136264	0	nbHerbicides_POIS	0.123655	0
		SowingDensity.seeds.m2._POIS	0.0103684	0.894495	PrimaryCropSowingDate_POIS	0.0209329	1	FreqLeavingCutCropBiomass_POIS	0.0105255	1	PrimaryCropSowingDate_POIS	0.0122109	0	MeanTillageDepth_POIS	0.011533	0.487694	timeHarvest1stTill_POIS	0.00829509	0.971673	Interrow.cm._POIS	0.0282722	0	timeLastTillSow_POIS	0.0188968	0	timeLastTillSow_POIS	0.0203608	0	timeLastTillSow_POIS	0.0577318	0	winterTillage_POIS	0.0577262	1
		PrimaryCropSowingDate_POIS	0.00980881	0.851304	SowingDensity.seeds.m2._POIS	0.0109132	1	nbResidueShredding.Broyage._POIS	0.0105255	1	timeLastTillSow_POIS	0.0106935	0	FreqLeavingCutCropBiomass_POIS	0.00970261	0	timeLastTillSow_POIS	0.00674782	0.193037	SowingDensity.seeds.m2._POIS	0.0265439	0.962372	MeanTillageDepth_POIS	0.0154016	1	MeanTillageDepth_POIS	0.0162298	1	winterTillage_POIS	0.0566251	1	SowingDensity.seeds.m2._POIS	0.0505442	1
		SowingDepth.cm._POIS	0.00532871	0	nbSuperficialTillage_POIS	0.00811156	0.809902	MaxTillageDepth_POIS	0.00765573	1	timeHarvest1stTill_POIS	0.00930659	0.0230208	nbResidueShredding.Broyage._POIS	0.00970261	0	MeanTillageDepth_POIS	0.00590285	0.234043	winterTillage_POIS	0.0189314	1	nbIncropHerbicides_POIS	0.00823483	0	nbIncropHerbicides_POIS	0.00779343	0	SowingDensity.seeds.m2._POIS	0.0542962	1	timeLastMechWeedingHarvest_POIS	0.0433748	1
		RowSowing.1or0._POIS	0.00400824	0	MaxTillageDepth_POIS	0.00731978	0.622428	nbMechWeeding_POIS	0.00759543	1	timeSow1stHerbicide_POIS	0.0092788	0.707811	PrimaryCropSowingDate_POIS	0.00775261	0.560282	meanMechWeedDepth.cm._POIS	0.00364056	1	SowingDepth.cm._POIS	0.0181968	0	PrimaryCropSowingDate_POIS	0.00791086	0	PrimaryCropSowingDate_POIS	0.00756189	0	timeLastMechWeedingHarvest_POIS	0.045958	1	timeSow1stHerbicide_POIS	0.0433748	1
		MaxTillageDepth_POIS	0.00364795	0	Interrow.cm._POIS	0.00627028	0	PrimaryCropSowingDate_POIS	0.00754881	0.674706	nbSuperficialTillage_POIS	0.00892889	0.598447	nbSuperficialTillage_POIS	0.00762029	0	SowingDensity.seeds.m2._POIS	0.00358414	0	timeLastTillSow_POIS	0.0174422	0	Interrow.cm._POIS	0.00738196	0	nbSuperficialTillage_POIS	0.0069996	1	timeSow1stHerbicide_POIS	0.045958	1	timeLastTillSow_POIS	0.037287	0
		MeanTillageDepth_POIS	0.00364795	0	MeanTillageDepth_POIS	0.00431169	0.376497	timeSow1stHerbicide_POIS	0.00652686	0.19352	SowingDensity.seeds.m2._POIS	0.00808961	0.542992	timeLastTillSow_POIS	0.00535707	0.980185	SunflowerBefore_POIS	0.00316306	0	nbRolling_POIS	0.0138667	1	nbMechWeeding_POIS	0.0052604	1	nbMechWeeding_POIS	0.00502619	1	Frequency_POIS	0.022086	1	MeanTillageDepth_POIS	0.0323858	0.284625
		nbSuperficialTillage_POIS	0.00364795	0	timeSow1stHerbicide_POIS	0.00422083	0.291986	nbHerbDicotSup75_POIS	0.00403236	1	Frequency_POIS	0.00752355	0	timeHarvest1stRoll_POIS	0.00451319	1	MaizeBefore_POIS	0.00296783	0	RowSowing.1or0._POIS	0.013498	0				FreqLeavingCutCropBiomass_POIS	0.00448024	1	MeanTillageDepth_POIS	0.0148328	1	Frequency_POIS	0.0202756	1
		WheatBefore_POIS	0.00364795	0	RowSowing.1or0._POIS	0.00369838	0	Interrow.cm._POIS	0.00379097	0	nbHerbicides_POIS	0.00651106	1	EfficacyDicot._POIS	0.00383384	0	PrimaryCropSowingDate_POIS	0.00199978	0	nbSuperficialTillage_POIS	0.00563768	0				nbResidueShredding.Broyage._POIS	0.00448024	1	nbMechWeeding_POIS	0.0139813	1	MaxTillageDepth_POIS	0.0163015	0
		winterTillage_POIS	0.00364795	0	SowingDepth.cm._POIS	0.00369838	0	MeanTillageDepth_POIS	0.0036769	1	nbIncropHerbicides_POIS	0.00651106	1	SowingDensity.seeds.m2._POIS	0.00371123	0.0691919	nbHerbMonocotSup75_POIS	0.00173583	0	summerTillage_POIS	0.00492868	0										nbMechWeeding_POIS	0.0123748	1
Winter	Rotation	Interrow.cm._POIS	0.0201034	0	timeLastTillSow_POIS	0.0252143	0	Frequency_POIS	0.0134736	0	timeLastHerbicideHarvest_POIS	0.00670969	0.777595	MaxTillageDepth_POIS	0.0134994	0.088584	MeanTillageDepth_POIS	0.0115122	0.890224	Interrow.cm._POIS	0.0139074	0.103321	PrimaryCropSowingDate_POIS	0.0467058	0.779661	MeanTillageDepth_POIS	0.0354784	0.291005	nbHerbicides_POIS	0.0419988	0	MaxTillageDepth_POIS	0.0370594	0.163288
		SowingDensity.seeds.m2._POIS	0.0104137	1	Frequency_POIS	0.0193532	0.233855	timeLastTillSow_POIS	0.00913845	0.0510783	MeanTillageDepth_POIS	0.00636817	0.89755	timeHarvest1stTill_POIS	0.0132614	0.637562	nbHerbDicotSup50_POIS	0.00975908	0	nbSuperficialTillage_POIS	0.0107414	0.805097	timeLastTillSow_POIS	0.040621	0.151042	nbHerbicides_POIS	0.0292286	0.00885403	PrimaryCropSowingDate_POIS	0.0335337	1	MeanTillageDepth_POIS	0.0259129	0
		PrimaryCropSowingDate_POIS	0.00733287	0.707602	PrimaryCropSowingDate_POIS	0.017427	0.960511	SowingDensity.seeds.m2._POIS	0.00873744	0.184028	MaxTillageDepth_POIS	0.00525624	0.228041	SowingDensity.seeds.m2._POIS	0.0112172	0.275362	PrimaryCropSowingDate_POIS	0.00843923	0.0701107	timeLastTillSow_POIS	0.0106686	0	nbHerbicides_POIS	0.0314034	0.0175527	nbSuperficialTillage_POIS	0.0215612	0	timeLastTillSow_POIS	0.0231208	0	EfficacyMonocot_POIS	0.0254815	1
		nbSuperficialTillage_POIS	0.00456502	1	MeanTillageDepth_POIS	0.01001	1	PrimaryCropSowingDate_POIS	0.00847062	0.267011	SowingDensity.seeds.m2._POIS	0.00504031	1	MeanTillageDepth_POIS	0.00846339	1	SowingDensity.seeds.m2._POIS	0.00723073	0.385417	EfficacyDicot._POIS	0.00949063	0.520548	Frequency_POIS	0.0229153	0.15618	PrimaryCropSowingDate_POIS	0.0215612	1	winterTillage_POIS	0.0205972	1	nbHerbicides_POIS	0.0226606	0
		meanMechWeedSpeed.km.h._POIS	0.00389067	0.114441	SowingDensity.seeds.m2._POIS	0.00910692	0.885222	timeSow1stHerbicide_POIS	0.00817851	0.0729167	PrimaryCropSowingDate_POIS	0.00419535	0.212766	timeLastTillSow_POIS	0.00728293	0.721311	MaxTillageDepth_POIS	0.00705108	1	timeHarvest1stTill_POIS	0.00781299	0.844262	nbHerbDicotSup50_POIS	0.0205834	1	SowingDensity.seeds.m2._POIS	0.0215612	1	summerTillage_POIS	0.0162047	1	summerTillage_POIS	0.0188323	0
		MeanTillageDepth_POIS	0.00382841	0.31401	Interrow.cm._POIS	0.00820459	0.294931	nbSuperficialTillage_POIS	0.00720864	0.949187	nbHerbMonocotSup75_POIS	0.00383207	1	propSpeciesMortSup80_POIS	0.00701992	0	nbRootHerbicides_POIS	0.00610014	0	timeSow1stHerbicide_POIS	0.00685409	0	nbHerbDicotSup75_POIS	0.0205834	1	EfficacyDicot._POIS	0.0180619	0	timeSow1stHerbicide_POIS	0.0145501	0	FreqLeavingCutCropBiomass_POIS	0.00924079	0
		nbMechWeeding_POIS	0.00372565	1	nbRootHerbicides_POIS	0.0060798	0.205882	nbHerbMonocotSup50_POIS	0.00455449	0.955414	timeHarvest1stTill_POIS	0.00382734	0.856115	timeLastPloughSow_POIS	0.00682227	0.147122	SowingDepth.cm._POIS	0.00588148	0	nbHerbDicotSup75_POIS	0.00520719	1	nbHerbMonocotSup50_POIS	0.0205834	1	nbFoliarHerbicides_POIS	0.0180619	1	nbRootHerbicides_POIS	0.0135972	1	nbResidueShredding.Broyage._POIS	0.00924079	0
		timeLastTillSow_POIS	0.00360531	0.337879	timeLastHerbicideHarvest_POIS	0.0054138	0.888	propSpeciesMortSup80_POIS	0.00371019	0.83908	winterTillage_POIS	0.00358949	0	meanMechWeedSpeed.km.h._POIS	0.00527931	0.3125	Frequency_POIS	0.0057193	1	nbRolling_POIS	0.00498467	1	nbHerbMonocotSup75_POIS	0.0205834	1	nbHerbDicotSup50_POIS	0.0180619	0	Frequency_POIS	0.00558503	0	timeHarvest1stTill_POIS	0.00874978	1
		propWeededArea_POIS	0.00356048	0.0935412	MaxTillageDepth_POIS	0.00531897	1	meanMechWeedDepth.cm._POIS	0.00296754	1	nbHerbDicotSup75_POIS	0.0035177	1	PrimaryCropSowingDate_POIS	0.00522125	1	timeHarvest1stPlough_POIS	0.00493169	1	timeLastHerbicideHarvest_POIS	0.00486664	0	nbIncropHerbicides_POIS	0.0205834	1	MaxTillageDepth_POIS	0.0121682	0	nbMechWeeding_POIS	0.00542816	1	timeLastMechWeedingHarvest_POIS	0.00784226	0
		timeHarvest1stTill_POIS	0.00349502	0.68254	summerTillage_POIS	0.00494746	0.288288	propWeededArea_POIS	0.00277255	0	EfficacyMonocot_POIS	0.00337934	1	timeLastHerbicideHarvest_POIS	0.00508091	0	Interrow.cm._POIS	0.00469165	1	SowingDensity.seeds.m2._POIS	0.00428555	1	nbMultiHerbicides_POIS	0.0205834	1	nbPseudorootHerbicides_POIS	0.0110998	1	nbSuperficialTillage_POIS	0.00375961	1	timeSow1stHerbicide_POIS	0.00708882	1

## Sheet: E.4 - BestOtherCropTechniques
Table E.4. The key techniques for management crops other than pea that drive potential yield and weed (dys)services in pea and in rotations including pea. The ten most influential other-crop techniques per pea-variety type, analysis scale and weed-impact indicator based on relative variable importance (VIP) in classification and regression trees analysing weed (dis)service indicators as a functio…																										max	0.265205	0.181851
Type of pea variety	Scale	PotentialEnergyYield			ActualEnergyYield			GrainYieldLoss			FieldInfestation			BeeFood			SpeciesRichness			Production profile (potential yield, yield loss score)			Integrated Management profile (potential yield, yield loss score, herbicide use)			Agroecology profile (potential yield, yield loss score, herbicide use, bee food offer)			Integrated Management profile (actual yield, herbicide use)			Agroecology profile (actual yield, herbicide use, bee food offer)
		Variable	VIP_relative	ProbIncreasedIndicator	Variable	VIP_relative	ProbIncreasedIndicator	Variable	VIP_relative	ProbIncreasedIndicator	Variable	VIP_relative	ProbIncreasedIndicator	Variable	VIP_relative	ProbIncreasedIndicator	Variable	VIP_relative	ProbIncreasedIndicator	Variable	VIP_relative	ProbIncreasedIndicator	Variable	VIP_relative	ProbIncreasedIndicator	Variable	VIP_relative	ProbIncreasedIndicator	Variable	VIP_relative	ProbIncreasedIndicator	Variable	VIP_relative	ProbIncreasedIndicator
Spring	Years with pea	WheatVariety	0.00419188		WheatVariety	0.0266844		WheatVariety	0.0169586		nbMechWeeding_R	0.046268	1	WheatVariety	0.0257908		WheatVariety	0.0135137		WheatVariety	0.061641		WheatVariety	0.0407484		WheatVariety	0.0336729		WheatVariety	0.0777018		WheatVariety	0.0538158
		Interrow.cm._BLE	0.00311082	0.704698	MaxTillageDepth_BLE	0.0131919	0.154112	nbMechWeeding_BLE	0.0111401	1	WheatVariety	0.0292574		nbShreddingFallow.Broyage._R	0.0191645	0.0431401	nbFoliarOnlyHerbicides_R	0.0102475	0.0158628	WinterTillage_R	0.0518209	0.709193	nbInCropHerbicides_R	0.0319911	0.082846	nbInCropHerbicides_R	0.0331858	0.082846	Frequency_ORGE	0.0370174	1	Frequency_ORGE	0.0317886	1
		MeanTillageDepth_BLE	0.00311082	0.704698	timeHarvest1stTill_BLE	0.0123262	0.534605	timeLastHerbicideHarvest_BLE	0.00892066	0.373426	PrimaryCropSowingDate_BLE	0.0220153	0.137435	harvestDate_BLE	0.0115506	0.0352787	maxTillageDepth_R	0.00869966	1	nbRootOnlyHerbicides_R	0.0422518	0	nbSuperficialTillage_COLZA	0.0254676	1	nbSystemicHerbicides_BLE	0.0248312	1	harvestDate_BLE	0.0370174	0	harvestDate_BLE	0.0317886	0
		nbManure_BLE	0.00311082	0.295302	WinterTillage_R	0.0113321	1	nbMechWeeding_R	0.00846378	1	harvestDate_BLE	0.017033	0.0313383	maxTillageDepth_R	0.00921182	0.292898	SummerTillage_R	0.00823025	0.958627	timeLastTillSow_BLE	0.0364422	0.852778	summerTillage_COLZA	0.0254676	1	timeSow1stHerbicide_COLZA	0.022841	0.591837	Frequency_COLZA	0.0338776	1	Frequency_COLZA	0.0315543	1
		nbManure_R	0.00311082	0.295302	nbShreddingFallow.Broyage._R	0.0104768	1	nbMultipleHerbicides_R	0.00787416	0.0969426	nbTillageOtherThanPloughOrRoll_R	0.0135876	0.928868	nbSuperficialTillage_BLE	0.00888622	0.196353	harvestDate_BLE	0.00767907	0	nbTillageOtherThanPloughOrRoll_R	0.0302115	1	nbSystemicHerbicides_BLE	0.0234285	1	nbMechWeeding_BLE	0.0214069	1	nbManure_R	0.0240738	0	nbManure_R	0.0215343	0
		timeHarvest1stTill_BLE	0.00311082	0.295302	propWeededArea_COLZA	0.00770971	0.89531	propWeededArea_BLE	0.00691652	0.671819	SummerTillage_R	0.0135055	0.604436	timeHarvest1stTill_BLE	0.00834211	0.744585	nbMultipleHerbicides_R	0.00737374	1	nbMultipleHerbicides_R	0.0288887	0.046532	nbMultipleHerbicides_R	0.0215866	0	timeLastMechWeedingHarvest_BLE	0.0214069	0	nbFoliarOnlyHerbicides_R	0.0224845	1	nbFoliarOnlyHerbicides_R	0.0183857	1
		SowingDepth.cm._BLE	0.00210075	0	maxTillageDepth_R	0.00722556	0.202298	harvestDate_COLZA	0.00683376	1	maxTillageDepth_R	0.0116846	0.971519	MaxTillageDepth_BLE	0.00807381	1	WinterTillage_R	0.00730685	0.0868726	timeSow1stHerbicide_BLE	0.0274974	1	timeSow1stHerbicide_COLZA	0.0212543	0.610751	nbMultipleHerbicides_R	0.0207217	0	timeSow1stHerbicide_COLZA	0.0224845	0	timeSow1stHerbicide_COLZA	0.0183857	0
		Interrow.cm._COLZA	0.00175274	0	nbPloughing_R	0.00706014	0.953855	timeLastTillSow_BLE	0.00595143	0.916004	nbMultipleHerbicides_R	0.0107495	0.981762	CropRotationLength_R	0.00757274	0.179222	nbHerbicides_R	0.0071912	0.79257	Frequency_COLZA	0.0250033	0	PrimaryCropSowingDate_COLZA	0.0197215	1	PrimaryCropSowingDate_COLZA	0.0188579	1	nbHerbicides_BLE	0.0131839	0	nbHerbicides_BLE	0.0112555	0
		maxTillageDepth_R	0.00175274	0	nbTillageOtherThanPloughOrRoll_R	0.00706014	0.891939	SowingDensity.seeds.m2._COLZA	0.00568036	0.686074	nbSystemicHerbicides_R	0.0094778	1	Frequency_BLE	0.00757274	0.820778	nbInCropHerbicides_R	0.0071912	0.79257	MaxTillageDepth_BLE	0.0250033	1	nbHerbicides_BLE	0.0182167	0	nbHerbicides_BLE	0.0177407	0	nbHerbicides_R	0.0131839	0	nbHerbicides_R	0.0112555	0
		meanMechWeedDepth.cm._BLE	0.00175274	1	CropRotationLength_R	0.00629847	1	nbNonSystemicHerbicides_R	0.00522511	0.0826446	timeHarvest1stTill_BLE	0.00842439	0.356379	nbTillageOtherThanPloughOrRoll_R	0.00755777	0.47882	propWeededArea_R	0.00694288	0.0223036	maxTillageDepth_R	0.0250033	0	nbHerbicides_R	0.0182167	0	nbHerbicides_R	0.0177407	0	timeSow1stHerbicide_BLE	0.0127952	1	RowSowing.1or0._BLE	0.00998475	1
Spring	Rotation	harvestDate_BLE	0.0625795	1	harvestDate_BLE	0.0385797	0.967131	Frequency_COLZA	0.0771169	1	Frequency_COLZA	0.152999	0.991634	maxTillageDepth_R	0.0818002	0.0691114	SummerTillage_R	0.123943	0.971884	MaxTillageDepth_COLZA	0.0266774	1	nbHerbicides_R	0.0621229	0	nbHerbicides_R	0.0395817	0.0368991	nbHerbicides_R	0.064138	0	timeLastTillSow_BLE	0.0334862	0.587678
		Interrow.cm._BLE	0.0303997	0	nbTillageOtherThanPloughOrRoll_R	0.0369075	0.789324	nbTillageOtherThanPloughOrRoll_R	0.0399416	0.993062	CropRotationLength_R	0.0264408	0	nbInCropHerbicides_R	0.0174451	1	MaxTillageDepth_BLE	0.019506	0.921223	PrimaryCropSowingDate_BLE	0.0252581	0.679545	nbInCropHerbicides_R	0.0357049	0	nbInCropHerbicides_R	0.0268238	0.174551	PrimaryCropSowingDate_BLE	0.060134	0.419355	nbRolling_R	0.0267971	1
		SowingDepth.cm._BLE	0.0233102	0	timeLastTillSow_BLE	0.0242671	0	PrimaryCropSowingDate_COLZA	0.0216688	0.0495427	Frequency_BLE	0.0264408	1	nbSuperficialTillage_COLZA	0.0170921	0.00824176	propWeededArea_COLZA	0.0172514	1	PrimaryCropSowingDate_COLZA	0.0243644	0.107474	harvestDate_BLE	0.0318336	1	harvestDate_BLE	0.0231518	0.482143	nbTillageOtherThanPloughOrRoll_R	0.0442285	0.938001	nbPloughing_R	0.025972	0.52
		RowSowing.1or0._BLE	0.0147853	0	Interrow.cm._BLE	0.0124994	0	harvestDate_COLZA	0.0148725	0.892423	Frequency_ORGE	0.0264408	0	nbHerbicides_R	0.0163238	1	timeSow1stHerbicide_COLZA	0.0106516	0.313725	Frequency_COLZA	0.0239618	0.90751	FreqLeavingCutCropBiomass_BLE	0.0269647	0.5	timeLastHerbicideHarvest_BLE	0.0216049	0.255814	summerTillage_BLE	0.0329461	1	nbSuperficialTillage_BLE	0.0256743	0.219178
		PrimaryCropSowingDate_COLZA	0.0123768	0.82798	SummerTillage_R	0.0124448	1	maxTillageDepth_R	0.0148607	0.303333	nbHerbicides_R	0.0179198	1	nbShreddingFallow.Broyage._R	0.0156786	0	harvestDate_BLE	0.00997837	0.0852965	CropRotationLength_R	0.0225717	0.229216	nbHerbicides_COLZA	0.0269647	0.5	nbTillageOtherThanPloughOrRoll_R	0.0200688	0.973545	maxTillageDepth_R	0.0303206	1	timeSow1stHerbicide_BLE	0.0228799	0.44
		propWeededArea_BLE	0.0118984	0.172973	PrimaryCropSowingDate_BLE	0.0108938	0.113946	MaxTillageDepth_COLZA	0.0146989	0.951456	nbInCropHerbicides_R	0.0179198	1	MeanTillageDepth_COLZA	0.0146855	0.194853	MaxTillageDepth_COLZA	0.00994275	0.924901	Frequency_BLE	0.0225717	0.770784	nbIncropHerbicides_COLZA	0.0269647	0.5	Frequency_COLZA	0.0192776	0.790816	timeHarvest1stTill_BLE	0.0276904	0	harvestDate_BLE	0.0215919	0.54
		MeanTillageDepth_BLE	0.00782003	0.486275	meanMechWeedDepth.cm._BLE	0.0101213	1	timeLastTillSow_BLE	0.0128535	0.0436681	nbNonSystemicHerbicides_R	0.016806	0.115991	MaxTillageDepth_COLZA	0.0124332	0.584071	SowingDensity.seeds.m2._BLE	0.0098399	0.410156	Frequency_MAIS	0.0225717	0.229216	nbShreddingFallow.Broyage._R	0.0262797	0.967742	meanMechWeedSpeed.km.h._BLE	0.0187848	0	SowingDensity.seeds.m2._COLZA	0.0251238	0.547009	nbPseudoRootOnlyHerbicides_R	0.0213664	0.375
		PrimaryCropSowingDate_ORGE	0.00626684	1	nbMultipleHerbicides_R	0.0101037	0.955696	Interrow.cm._COLZA	0.0122815	0.349515	MeanTillageDepth_BLE	0.0131449	0.950292	SowingDensity.seeds.m2._BLE	0.012312	0.0306748	CropRotationLength_R	0.00970549	0	Frequency_ORGE	0.0225717	0.229216	SowingDensity.seeds.m2._COLZA	0.0253845	0.657534	SowingDensity.seeds.m2._COLZA	0.016273	0.587302	timeLastTillSow_BLE	0.0244874	0	SowingDensity.seeds.m2._BLE	0.0209393	0.816901
		nbSuperficialTillage_BLE	0.00626059	0.630631	nbHerbMonocotSup75_BLE	0.00896421	1	SowingDensity.seeds.m2._BLE	0.0100529	0.0842105	timeSow1stHerbicide_BLE	0.0127237	0.332943	EfficacyMonocot_BLE	0.0108979	0.946043	Frequency_BLE	0.00970549	1	Frequency_TOURNESOL	0.0225717	0.229216	Frequency_COLZA	0.0242924	0.939203	timeLastTillSow_COLZA	0.0162609	0.189956	timeHarvest1stTill_COLZA	0.023896	1	nbHerbicides_R	0.020375	0
		PrimaryCropSowingDate_BLE	0.00619859	0	Frequency_ORGE	0.00831106	0.0726744	nbRolling_R	0.00758546	1	SowingDensity.seeds.m2._BLE	0.0127036	0.141844	timeSow1stHerbicide_BLE	0.0107982	0.169057	Frequency_COLZA	0.00970549	0	harvestDate_BLE	0.0224557	0.928702	CropRotationLength_R	0.0193211	0.69797	summerTillage_BLE	0.0139719	0.827586	timeSow1stHerbicide_BLE	0.0218709	1	timeHarvest1stTill_BLE	0.0199727	0.0952381
Winter	Years with pea	harvestDate_BLE	0.00601954	0.493333	WheatVariety	0.0209345		WheatVariety	0.016823		nbMechWeeding_R	0.0583506	1	WheatVariety	0.0251393		WheatVariety	0.0176781		timeLastHerbicideHarvest_BLE	0.0356107	0.531792	WheatVariety	0.0406943		nbHerbicides_BLE	0.0350923	0	WheatVariety	0.0846231		WheatVariety	0.0814793
		WheatVariety	0.00381274		propWeededArea_COLZA	0.00673724	1	nbTillageOtherThanPloughOrRoll_R	0.0118812	0.413845	nbFallowHerbicides_BLE	0.0394444	1	nbTillageOtherThanPloughOrRoll_R	0.00992952	0	timeSow1stHerbicide_BLE	0.00797257	0.623557	nbTillageOtherThanPloughOrRoll_R	0.0285466	0.975723	nbHerbicides_BLE	0.0371638	0	nbHerbicides_R	0.0350923	0	PrimaryCropSowingDate_BLE	0.0587089	0.911055	EfficacyDicot._COLZA	0.0433748	0
		MaxTillageDepth_BLE	0.00364795	0	propWeededArea_R	0.00673724	1	PrimaryCropSowingDate_BLE	0.010772	0.13314	WheatVariety	0.019613		harvestDate_BLE	0.00945282	0	MaxTillageDepth_COLZA	0.00678685	0.58149	timeLastTillSow_BLE	0.0274244	0.178218	nbHerbicides_R	0.0371638	0	WheatVariety	0.0300098		EfficacyDicot._COLZA	0.045958	0	EfficacyMonocot_BLE	0.0433748	1
		MeanTillageDepth_BLE	0.00364795	0	EfficacyDicot._COLZA	0.00567512	0.422078	maxTillageDepth_R	0.00939729	0	harvestDate_BLE	0.012985	0.00402414	timeLastTillSow_COLZA	0.00941861	0.6329	WinterTillage_R	0.00677365	0.927357	timeHarvest1stTill_COLZA	0.0259543	0	nbIncropHerbicides_BLE	0.0193799	0	summerPlough_BLE	0.0187561	1	EfficacyMonocot_BLE	0.045958	1	MaxTillageDepth_BLE	0.0433748	0
		nbIrrigation_BLE	0.00364795	0	nbTillageOtherThanPloughOrRoll_R	0.00548693	1	harvestDate_BLE	0.00743423	0.265078	maxTillageDepth_R	0.0108577	0.645089	PrimaryCropSowingDate_BLE	0.0089458	0.706622	MeanTillageDepth_BLE	0.00676289	0.0167981	SowingDensity.seeds.m2._BLE	0.0246682	0.813793	nbInCropHerbicides_R	0.0193799	0	nbIncropHerbicides_BLE	0.0179882	0	MaxTillageDepth_BLE	0.045958	0	meanMechWeedSpeed.km.h._BLE	0.0433748	1
		nbIrrigation_R	0.00364795	0	nbMechWeeding_R	0.00522177	1	timeLastTillSow_BLE	0.00453122	0	PrimaryCropSowingDate_COLZA	0.0087717	0.189868	SowingDensity.seeds.m2._BLE	0.00873197	0.975242	nbRolling_R	0.00660149	1	WheatVariety	0.0245656		timeLastTillSow_COLZA	0.0177894	0	nbInCropHerbicides_R	0.0179882	0	meanMechWeedSpeed.km.h._BLE	0.045958	1	nbHerbDicotSup75_COLZA	0.0433748	0
		totalIrrigaton.mm.ha._BLE	0.00364795	0	summerTillage_BLE	0.00519807	0	propWeededArea_R	0.00375849	1	timeHarvest1stTill_BLE	0.00830155	1	propWeededArea_R	0.00638051	0.83327	harvestDate_BLE	0.00628289	0	nbSuperficialTillage_BLE	0.021744	0	summerPlough_BLE	0.016403	1	timeLastTillSow_COLZA	0.016858	0	nbHerbDicotSup75_COLZA	0.045958	0	nbHerbMonocotSup50_BLE	0.0433748	1
		nbIrrigation_COLZA	0.00328733	1	harvestDate_COLZA	0.00493272	0.216518	timeHarvest1stTill_BLE	0.00367493	0	nbSuperficialTillage_BLE	0.00828525	0.458567	MaxTillageDepth_COLZA	0.00612426	0.0138117	SowingDensity.seeds.m2._BLE	0.00584161	1	harvestDate_BLE	0.0138667	1	maxTillageDepth_R	0.0101705	0	maxTillageDepth_R	0.00963618	0	nbHerbMonocotSup50_BLE	0.045958	1	nbSystemicHerbicides_COLZA	0.0433748	0
		totalIrrigaton.mm.ha._COLZA	0.00328733	1	PrimaryCropSowingDate_BLE	0.00422267	0.334112	nbMechWeeding_BLE	0.0034371	1	CropRotationLength_R	0.00752355	1	SowingDensity.seeds.m2._COLZA	0.00611001	0.264342	SowingDepth.cm._BLE	0.00568585	0.923795	nbRolling_R	0.0138667	1	nbMultipleHerbicides_R	0.00823483	0	nbMultipleHerbicides_R	0.00779343	0	nbSystemicHerbicides_COLZA	0.045958	0	PrimaryCropSowingDate_BLE	0.0433748	0
		nbPloughing_R	0.00295613	0	nbHerbDicotSup75_COLZA	0.00413078	0	nbPloughing_R	0.00337596	0	Frequency_BLE	0.00752355	0	maxTillageDepth_R	0.00588367	0.648071	Frequency_COLZA	0.00537771	1	nbShreddingFallow.Broyage._R	0.0138667	1	nbHerbDicotSup50_COLZA	0.00737263	1	nbHerbDicotSup50_COLZA	0.00738551	1	PrimaryCropSowingDate_COLZA	0.045958	1	PrimaryCropSowingDate_COLZA	0.0433748	1
Winter	Rotation	harvestDate_BLE	0.0750561	0.994025	timeLastTillSow_BLE	0.0362857	0.0198413	Frequency_COLZA	0.10051	1	maxTillageDepth_R	0.131756	0.153148	nbTillageOtherThanPloughOrRoll_R	0.105549	0.20285	maxTillageDepth_R	0.0623804	1	SowingDensity.seeds.m2._BLE	0.0357206	0.497881	WinterTillage_R	0.0630398	0.229508	nbFoliarOnlyHerbicides_R	0.0396231	1	nbHerbicides_R	0.181851	0	nbHerbicides_R	0.0885627	0
		RowSowing.1or0._BLE	0.0410816	0	harvestDate_BLE	0.0236655	0.98192	timeLastTillSow_BLE	0.0275809	0	nbMechWeeding_R	0.0965634	1	nbSuperficialTillage_COLZA	0.0190656	0	meanMechWeedSpeed.km.h._COLZA	0.0246441	1	harvestDate_BLE	0.0301732	1	nbHerbicides_R	0.0607518	0	harvestDate_BLE	0.0370778	0.668088	nbHerbicides_BLE	0.0419988	0	PrimaryCropSowingDate_BLE	0.0451823	0.45828
		SowingDepth.cm._BLE	0.0410816	0	CropRotationLength_R	0.0193532	0.766145	nbTillageOtherThanPloughOrRoll_R	0.0256699	0.996631	Frequency_ORGE	0.0145802	1	harvestDate_BLE	0.0161928	0.161476	MaxTillageDepth_COLZA	0.0139946	1	PrimaryCropSowingDate_COLZA	0.0242953	0.00707786	timeLastTillSow_BLE	0.0405914	0	timeLastTillSow_BLE	0.0328786	0	nbRolling_R	0.0275097	1	nbPseudoRootOnlyHerbicides_R	0.0326549	0
		Interrow.cm._BLE	0.0298168	0	Frequency_BLE	0.0193532	0.233855	PrimaryCropSowingDate_COLZA	0.0186027	0.059633	timeSow1stHerbicide_BLE	0.0118675	0.0918463	WinterTillage_R	0.0142569	0.83562	timeLastTillSow_BLE	0.0119706	0.192308	SowingDepth.cm._COLZA	0.0213395	0.585242	PrimaryCropSowingDate_BLE	0.0400473	0	MeanTillageDepth_BLE	0.0323191	0.740741	harvestDate_BLE	0.0265962	1	nbMechWeeding_BLE	0.0282636	1
		PrimaryCropSowingDate_BLE	0.0196405	0	Frequency_COLZA	0.0187909	0.973897	timeLastTillSow_COLZA	0.0178991	0.0909871	PrimaryCropSowingDate_COLZA	0.0113236	0	nbRootOnlyHerbicides_R	0.0112137	0.95887	harvestDate_BLE	0.00920255	0.0114679	timeLastTillSow_COLZA	0.0206114	0.129129	Frequency_COLZA	0.0288454	1	nbInCropHerbicides_R	0.0306068	0	propWeededArea_COLZA	0.0234378	1	nbMechWeeding_R	0.0282636	1
		timeSow1stMechWeeding_COLZA	0.00925972	0.619355	Interrow.cm._BLE	0.0187618	0	harvestDate_BLE	0.0147183	0.920763	harvestDate_BLE	0.0105868	0.0145584	nbPloughing_R	0.0103333	0.621429	SummerTillage_R	0.00800552	0	timeLastTillSow_BLE	0.01966	0.0223262	harvestDate_COLZA	0.0263257	1	maxTillageDepth_R	0.0298991	0.12304	nbInCropHerbicides_R	0.0221158	0	nbHerbicides_BLE	0.0226606	0
		PrimaryCropSowingDate_COLZA	0.00870759	1	PrimaryCropSowingDate_BLE	0.010597	0.258152	CropRotationLength_R	0.0134736	1	meanMechWeedDepth.cm._BLE	0.00995599	1	MeanTillageDepth_BLE	0.0101696	0.800971	nbTillageOtherThanPloughOrRoll_R	0.00761229	1	SummerTillage_R	0.01911	1	MaxTillageDepth_COLZA	0.0261643	0.83908	nbHerbicides_R	0.0296551	0	nbMechWeeding_R	0.0198952	1	nbRolling_R	0.0216099	1
		MeanTillageDepth_BLE	0.00762857	0.568129	MeanTillageDepth_COLZA	0.00823552	0.860724	Frequency_BLE	0.0134736	0	nbMultipleHerbicides_R	0.00904119	0.525157	timeHarvest1stTill_BLE	0.00939881	0.431034	timeHarvest1stTill_COLZA	0.00753256	1	EfficacyDicot._BLE	0.0176925	0.745455	harvestDate_BLE	0.0259541	1	nbTillageOtherThanPloughOrRoll_R	0.0288806	0	timeLastTillSow_BLE	0.019675	0	nbTillageOtherThanPloughOrRoll_R	0.0213252	0
		nbTillageOtherThanPloughOrRoll_R	0.00741741	0.25	WinterTillage_R	0.00759196	0	Frequency_MAIS	0.0134736	1	nbSystemicHerbicides_R	0.00871935	0.610577	timeHarvest1stPlough_BLE	0.00673504	1	MaxTillageDepth_BLE	0.00702947	1	nbHerbDicotSup75_BLE	0.0176925	0.745455	nbInCropHerbicides_R	0.0238365	0	PrimaryCropSowingDate_BLE	0.0286575	0.878049	Interrow.cm._BLE	0.0171132	0	nbInCropHerbicides_R	0.0196503	0
		nbSuperficialTillage_BLE	0.00686815	0.386243	nbHerbicides_R	0.00752946	0.893293	Frequency_ORGE	0.0134736	1	timeLastTillSow_BLE	0.00834	0.282364	maxTillageDepth_R	0.00652105	0.135889	SowingDensity.seeds.m2._COLZA	0.0069038	1	MeanTillageDepth_COLZA	0.0175746	0.588737	CropRotationLength_R	0.0229153	0.84382	nbFallowHerbicides_BLE	0.0239159	1	SowingDensity.seeds.m2._BLE	0.0167431	0.61326	nbShreddingFallow.Broyage._R	0.0171559	0

## Sheet: E.5 - BestSituations
Table E.5. Effet of situation on potential yield and weed (dys)services in pea and in rotations including pea. Ranking situations with a significant effect per pea-variety type, analysis scale and weed-impact indicator based on relative variable importance (VIP) in classification and regression trees analysing weed (dis)service indicators as a function of situation, pea parameters, pea management…																										max	0.265205	0.249224
Type of pea variety	Scale	PotentialEnergyYield			ActualEnergyYield			GrainYieldLoss			FieldInfestation			BeeFood			SpeciesRichness			Production profile (potential yield, yield loss score)			Integrated Management profile (potential yield, yield loss score, herbicide use)			Agroecology profile (potential yield, yield loss score, herbicide use, bee food offer)			Integrated Management profile (actual yield, herbicide use)			Agroecology profile (actual yield, herbicide use, bee food offer)
		Variable	VIP_relative	ProbIncreasedIndicator	Variable	VIP_relative	ProbIncreasedIndicator	Variable	VIP_relative	ProbIncreasedIndicator	Variable	VIP_relative	ProbIncreasedIndicator	Variable	VIP_relative	ProbIncreasedIndicator	Variable	VIP_relative	ProbIncreasedIndicator	Variable	VIP_relative	ProbIncreasedIndicator	Variable	VIP_relative	ProbIncreasedIndicator	Variable	VIP_relative	ProbIncreasedIndicator	Variable	VIP_relative	ProbIncreasedIndicator	Variable	VIP_relative	ProbIncreasedIndicator
Spring	Years with pea				Harmful weeds+Bee food	0.0146332	1	Harmful weeds+Bee food	0.0499501	1	Harmful weeds+Bee food	0.0435566	1	Harmful grass weeds	0.0607783	0	Harmful weeds+Bee food	0.125466	1	Harmful weeds+Bee food	0.0125113	0.771358	Harmful weeds+Bee food	0.0533577	1	Harmful weeds+Bee food	0.0598467	1	4-year rotation	0.0370174	1	4-year rotation	0.0317886	1
					2-year rotation	0.00629847	0	Complete management	0.00512997	1	6-year rotation	0.00136552	0	6-year rotation	0.00386219	1	Harmful grass weeds	0.0131163	1	Complete management	0.0114389	1	Organic	0.0182167	1	Organic	0.0177407	1	Organic	0.0131839	1	Harmful grass weeds	0.0172199	0
					4-year rotation	0.0032543	1	4-year rotation	0.00246373	1				2-year rotation	0.00090847	1													Harmful weeds+Bee food	0.0125787	1	Organic	0.0112555	1
								Harmful grass weeds	0.00151739	1																						Harmful weeds+Bee food	0.00563203	1
Spring	Rotation	2-year rotation	0.119501	1	Harmful weeds+Bee food	0.0549228	1	Harmful weeds+Bee food	0.143904	1	Harmful grass weeds	0.0875273	0	Harmful grass weeds	0.129618	0	Harmful weeds+Bee food	0.249224	1	2-year rotation	0.0225717	0.770784	2-year rotation	0.0193211	0.30203	2-year rotation	0.0101112	1	Harmful weeds+Bee food	0.0270709	1	Complete management	0.00869051	1
		6-year rotation	0.0284121	1	4-year rotation	0.00107162	1	2-year rotation	0.00670863	0	Harmful weeds+Bee food	0.0535179	1	2-year rotation	0.00100072	1	Harmful grass weeds	0.0404052	1	6-year rotation	0.0225717	0.229216	6-year rotation	0.0154427	0.259336	Harmful weeds+Bee food	0.00905342	1	Organic	0.0150502	1	Harmful grass weeds	0.00526819	0
		4-year rotation	0.00367083	0.622093				6-year rotation	0.00670863	1	4-year rotation	0.0245661	0	Reference (3-year rotation+Conventional management+All weeds	0.000937516	0	2-year rotation	0.00970549	1	Harmful weeds+Bee food	0.00161787	1	Harmful weeds+Bee food	0.0110769	1	6-year rotation	0.00685875	0				Harmful weeds+Bee food	0.00364175	1
											Reference (3-year rotation+Conventional management+All weeds	0.022987	0							Complete management	0.00134603	1	Organic	0.00579755	1	Harmful grass weeds	0.00680117	0
											2-year rotation	0.00187475	1
											6-year rotation	0.00187475	0
Winter	Years with pea	2-year rotation	0.00364795	0	Harmful weeds+Bee food	0.057923	1	Harmful weeds+Bee food	0.118537	1	Harmful weeds+Bee food	0.0838555	1	Harmful grass weeds	0.0733221	0	Harmful weeds+Bee food	0.105328	1	Harmful weeds+Bee food	0.0245006	1	Harmful weeds+Bee food	0.045853	1	Organic	0.0350923	1	Harmful weeds+Bee food	0.0527652	1	Harmful weeds+Bee food	0.0369142	1
					2-year rotation	0.00258999	0.166725				2-year rotation	0.00752355	0	No till	0.00217048	1	Harmful grass weeds	0.0291191	1	2-year rotation	0.00203049	0	Organic	0.0371638	1	Harmful weeds+Bee food	0.0317211	1	Organic	0.0211837	1	Organic	0.0180451	1
					Organic	0.00104063	1				Harmful grass weeds	0.00560399	0	Harmful weeds+Bee food	0.00120412	1																Harmful grass weeds	0.00679604	0
Winter	Rotation	2-year rotation	0.0672692	0.983337	Harmful weeds+Bee food	0.142165	1	Harmful weeds+Bee food	0.206802	1	Harmful weeds+Bee food	0.17588	1	Harmful grass weeds	0.131879	0	Harmful weeds+Bee food	0.206832	1	Harmful weeds+Bee food	0.00336376	1	2-year rotation	0.0202756	0	Harmful weeds+Bee food	0.0160475	1	Organic	0.0419988	1	Organic	0.0226606	1
		6-year rotation	0.0126792	1	2-year rotation	0.012785	0.0274348	2-year rotation	0.0134736	0	Reference (3-year rotation+Conventional management+All weeds	0.0170291	1	Reference (3-year rotation+Conventional management+All weeds	0.00283898	0	Harmful grass weeds	0.0813551	1	2-year rotation	0.00144789	0	Harmful weeds+Bee food	0.0138754	1	Harmful grass weeds	0.0100409	0	Harmful weeds+Bee food	0.0373928	1	Harmful grass weeds	0.0226182	0
		Complete management	0.00341532	0.135048				6-year rotation	0.0134736	1	4-year rotation	0.0145802	1	2-year rotation	0.0022655	0	2-year rotation	0.0057193	1	6-year rotation	0.00144789	1	6-year rotation	0.0115872	0.560683	Organic	0.0076674	1	2-year rotation	0.00558503	0	Harmful weeds+Bee food	0.0140415	1
		4-year rotation	0.00300744	0.107776							Harmful grass weeds	0.00216882	0	Harmful weeds+Bee food	0.00112283	1	Reference (3-year rotation+Conventional management+All weeds	0.00115975	1				Organic	0.01082	1	2-year rotation	0.00680661	0
																										6-year rotation	0.00238104	1
																										No till	0.00235468	1

## Sheet: E.6 - ExplainParameters
Table E.6. Biophysical reasons for the effects of pea parameters on potential yield and weed (dys)services identified with classification and regression trees analysing weed (dis)service indicators as a function of situation, pea parameters, pea management techniques and other-crop management techniques and summarized in section E.2 of the present excel file.
In italic, only concern potential yield			Explanation of pea trait effect on cropping-system performance		Harmfulness indicators				Biodiversity indicators
Illogical for crop production and weed suppression (but not necessarily for species richness)			Potential yield		Control 0 = highest yield loss, highest field infesetation				0 = lowest bee food offer
			Yield loss control		Control 1 = lowest yield loss, lowest field infestation				1 = higheest bee food offer
			Field infestation control
			Increased	Decreased	Probability that										VIP					Max VIP	Type of trait	min-max in pea varieties (other crops)	Pea (actual and virtual varieties)		Pea (actual varieties only)		Crops other than pea
Pea traits			Bee food		Potential yield		Yield loss control		Field infestation control		Bee food		Species richness		Potential yield	Yield loss control	Field infestation	Bee food
Name	Meaning	Unit	Decreased	Increased	Increased	Decreased	Increased	Decreased	Increased	Decreased	Decreased	Increased	Decreased	Increased									min	max	min	max	min	max
Afila	Pea morpholoy	Leafy or afila									#N/A	#N/A	#N/A	#N/A						0	Morphology	0.00; 1.00 (0.00; 0.00)	0	1	0	1
b_HMearly	Sensitivity of plant height to above-ground plant biomass after emergence	none	Heavier crop plants are taller per unit biomass than lighter plants, resulting in taller canopies	Crop plant height depends on plant biomass, resulting in a heterogeneous canopy after emergence			1	0			#N/A	#N/A	1	0		0.021219				0.021219	Morphology	0.06; 0.40 (0.06; 0.91)	0.060079	0.396968	0.060079	0.396968	0.055749	0.910573
b_HMlate	Sensitivity of plant height to above-ground plant biomass during reproduction	none	Heavier crop plants are taller per unit biomass than lighter plants, resulting in taller canopies	Crop plant height depends on plant biomass, resulting in a heterogeneous canopy during reproduction							#N/A	#N/A	#N/A	#N/A						0	Morphology	0.12; 0.37 (0.05; 0.53)	0.115715	0.370051	0.115715	0.370051	0.048972	0.534328
b_HMmid	Sensitivity of plant height to above-ground plant biomass during vegetatvie stage	none	Heavier crop plants are taller per unit biomass than lighter plants, resulting in taller canopies	Crop plant height depends on plant biomass, resulting in a heterogeneous canopy during vegetative growth			1	0.00962704			#N/A	#N/A	1	0		0.0249466				0.0249466	Morphology	0.11; 0.35 (0.05; 0.75)	0.111606	0.351887	0.111606	0.351887	0.047631	0.749448
b_RBR	Sensitivity of root biomass ratio RBR to total plant biomass	none	Heavier crop plants have a larger root system. Root system size is important even if water and nitrogen supply are unlimited?	Crop root biomass ratio is independent of cropplant biomass. Root systems are uniform across crop canopy							#N/A	#N/A	#N/A	#N/A						0	Morphology	0.64; 0.95 (0.95; 1.04)	0.638246	0.954325	0.638246	0.954325	0.954325	1.03973
b_RLHearly	Unevenness of leaf area distribution along plant height after emergence. The lower this parameter, the more uniformly leaf area is distributed along plant height	none	Crop leaf area of crop plants is concentrated at plant height = RLH, and together with a high RLH, this results in more shading of smaller weeds	Crop leaf area is distributed unevenly along plant height in crops resulting in a heterogeneous canopy	0.258873	0.741127					#N/A	#N/A	1	0	0.0315122					0.0315122	Morphology	2.02; 3.01 (1.75; 58.08)	2.02052	3.00646	2.02052	3.00646	1.74834	58.0761
b_RLHlate	Unevenness of leaf area distribution along plant height during reproduction. The lower this parameter, the more uniformly leaf area is distributed along plant height	none	Crop leaf area of crop plants is concentrated at plant height = RLH, and together with a high RLH, this results in more shading of smaller weeds	Crop leaf area is distributed unevenly along plant height in crops resulting in a heterogeneous canopy	0.689265	1			0	1	0	1	0.0811808	0.918819	0.149693		0.00774693	0.00412673		0.149693	Morphology	1.94; 4.62 (1.28; 20.64)	1.94358	4.62176	1.94358	4.62176	1.27537	20.6406
b_RLHmid	Unevenness of leaf area distribution along plant height during vegetative stage. The lower this parameter, the more uniformly leaf area is distributed along plant height	none	Crop leaf area of crop plants is concentrated at plant height = RLH, and together with a high RLH, this results in more shading of smaller weeds	Crop leaf area is distributed unevenly along plant height in crops resulting in a heterogeneous canopy					0.937931	0.062069	#N/A	#N/A	#N/A	#N/A			0.00600735			0.00600735	Morphology	1.99; 2.67 (1.75; 41.84)	1.98643	2.67015	1.98643	2.67015	1.74834	41.8425
b_WMearly	Sensitivity of plant width to above-ground plant biomass after emergence (if b_WM is 0, plant width is constant irrespective of plant biomass; the larger b_WM, the more plant width increases with plant biomass)	none	Heavier crop plants are wider, increasing soil coverage and light interception by the crops, increasing crop biomass production and shade cast on weeds	Crop plant width is independent of plant biomass, resulting in a uniform crop canopy	1	0					1	0	#N/A	#N/A	0.197537			0.00412673		0.197537	Morphology	0.17; 0.79 (0.05; 0.75)	0.16551	0.787197	0.16551	0.787197	0.051796	0.745256
b_WMlate	Sensitivity of plant width to above-ground plant biomass during reproduction (if b_WM is 0, plant width is constant irrespective of plant biomass; the larger b_WM, the more plant width increases with plant biomass)	none	Heavier crop plants are wider, increasing soil coverage and light interception by the crops, increasing crop biomass production and shade cast on weeds	Crop plant width is independent of plant biomass, resulting in a uniform crop canopy							#N/A	#N/A	#N/A	#N/A						0	Morphology	0.23; 0.43 (0.05; 0.66)	0.234357	0.432013	0.234357	0.432013	0.050435	0.657976
b_WMmid	Sensitivity of plant width to above-ground plant biomass during vegetative stage (if b_WM is 0, plant width is constant irrespective of plant biomass; the larger b_WM, the more plant width increases with plant biomass)	none	Heavier crop plants are wider, increasing soil coverage and light interception by the crops, increasing crop biomass production and shade cast on weeds	Crop plant width is independent of plant biomass, resulting in a uniform crop canopy			1	0			#N/A	#N/A	1	0		0.00986728				0.00986728	Morphology	0.21; 0.60 (0.07; 0.63)	0.212207	0.602206	0.212207	0.602206	0.070698	0.628341
baseTempDev	Base temperature for development	°C		Crop development is slowed down					1	1	0.117397	0.882603	0	1			0.00447109	0.00277936		0.00447109	Phenology	-1.00; 1.00 (0.00; 8.10)	-1	1	0	0	0	8.1
baseTempGerm	Base temperature for germination	°C	Crop emergence is delayed, thus increasing herbicide efficiency (less "umbrella" effect)	Crop emergence is delayed, thus reducing crop growth duration and leaving more space and light to earlier emerging weeds					0	1	#N/A	#N/A	#N/A	#N/A			0.00305723			0.00305723	GerminationEmergence	-0.90; 1.00 (-1.75; 8.10)	-0.9	1	-0.9	1	-1.75	8.1
baseWaterPotential	Base water potential for germination	MPa	Crop seed germination only occurs in very moist soil, limiting the risk of seedling loss if the soil starts to dry after germination. Crop emergence is delayed, thus increasing herbicide efficiency (less "umbrella" effect)	More crop seedlings are lost to drought and crop emergence is delayed, thus reducing crop growth duration and leaving more space/light to earlier emerging weeds					1	0	#N/A	#N/A	1	0			0.00305723			0.00305723	GerminationEmergence	-2.53; -2.07 (-2.90; -0.50)	-2.53	-2.07	-2.3	-2.3	-2.9	-0.5
beta	Seedling mortality on soil surface in intermediate soil structure	seedling/seeding		Increased pre-emergent crop seedling loss							#N/A	#N/A	#N/A	#N/A						0	GerminationEmergence	-4.46; -3.65 (-3.96; -2.95)	-4.46181	-3.65058	-4.05619	-4.05619	-3.95848	-2.94543
betaCompacted	additional seedling mortality in compacted vs. intermediate soil structure	seedlings∙seedlings-1∙lnmm-1		Increased pre-emergent crop seedling loss	0.238655	0.761345					#N/A	#N/A	1	0	0.00615554					0.00615554	GerminationEmergence	0.73; 0.89 (0.46; 0.71)	0.73161	0.89419	0.8129	0.8129	0.458	0.711701
betaFineEarth	additional seedling mortality in fine earth vs. intermediate soil structure	seedlings∙seedlings-1∙lnmm-1		Increased pre-emergent crop seedling loss							#N/A	#N/A	0.545455	1						0	GerminationEmergence	-1.16; -0.95 (-0.85; -0.32)	-1.16281	-0.95139	-1.0571	-1.0571	-0.846918	-0.32
C0buried	smallest buried clod causing seedling death	mm		More crop seedlings die due to soil compaction, leaving more space/resources for weeds							#N/A	#N/A	1	1						0	GerminationEmergence	33.6; 41.0 (10.0; 29.5)	33.57	41.03	37.3	37.3	10	29.5155
C0surface	smallest surface clod causing seedling death	mm		More crop seedlings die due to soil compaction, leaving more space/resources for weeds							#N/A	#N/A	0.922078	0.0779221						0	GerminationEmergence	32.7; 39.9 (19.2; 34.0)	32.67	39.93	36.3	36.3	19.155	34
darknessReduction.YOUNG_SEEDS.	Germination fability if seeds are in darkness	seeds/seeds	Seed germination ability is less or not affected by darkness	Fewer crop seeds germinate and emerge, reducing crop canopy density and leaving more space/light to weeds			0	1			#N/A	#N/A	#N/A	#N/A		0.058545				0.058545	GerminationEmergence	0.90; 1.10 (0.40; 1.00)	0.9	1.1	1	1	0.4	1
Emax	Potential maximal extension of the root system	mm	A more voluminous crop root system leaves less water for weed seed germination and pre-emergent growth	A more voluninous crop root system leaves less above-ground biomass and less ability to compete for light			1	0	0.973267	0.0267332	0.27112	0.72888	#N/A	#N/A		0.0395314	0.00694642	0.00252425		0.0395314	Roots	213; 301 (191; 363)	213	301	213	301	191	363
Energy	Energy content of crop seeds	MJ/kg dry matter	Higher crop energy yield for a given crop grain yield								#N/A	#N/A	#N/A	#N/A						0	Harvest	16.5; 20.1 (18.0; 28.8)	16.47	20.13	18.3	18.3	18	28.8
Epsi_b	Light conversion efficiency	g/MJ	Crop photosynthesis is more efficient, producing more crop biomass and casting more shade on weeds						1	0	#N/A	#N/A	1	0			0.00397051			0.00397051	Growth	2.97; 3.63 (2.50; 5.53)	2.97	3.63	3.3	3.3	2.5	5.53
g0	Time from germination triggering (sowing if moist soil, post-sowing rainfall otherwise) to first germinated seed	°C days	Crop emergence is delayed, protecting spring-sown crops from frost and increasing herbicide efficiency (less "umbrella" effect)	Crop germination and emergence are delayed, reducing crop growth duration	0.465376	0.534624	0.0388802	1			0.822622	0.177378	#N/A	#N/A	0.0133712	0.0582986		0.0036045		0.0582986	GerminationEmergence	15.0; 24.9 (6.4; 33.3)	15	24.8613	15	24.8613	6.41807	33.3411
g50	Time from germination triggering (sowing if moist soil, post-sowing rainfall otherwise) to 50% germinated non-dormant seeds	°C days	Crop emergence is delayed, protecting spring-sown crops from frost and increasing herbicide efficiency (less "umbrella" effect)	Crop germination and emergence are delayed, reducing crop growth duration					0	1	1	0	#N/A	#N/A			0.00796699	0.00298257		0.00796699	GerminationEmergence	29.0; 32.0 (7.4; 50.0)	29	32	29	32	7.41807	50
gamma	Increase of seedling mortality with seed depth	seedlings∙seedlings-1∙lnmm-1		More crop seedling loss during pre-emergent growth			0.253623	1			0	1	#N/A	#N/A		0.058545		0.00368463		0.058545	GerminationEmergence	0.30; 0.37 (0.41; 0.58)	0.30204	0.36916	0.3356	0.3356	0.407904	0.582
gb	Shape parameter for germination progress. The higher this value, the later the germination onset but the higher the germination speed.	none	Crop germination flush is short and fast, resulting in fewer emergence cohorts and a more homogeneous crop canopy	Crop emergene starts later, leaving the advantage to earlier emerging weeds							#N/A	#N/A	1	0						0	GerminationEmergence	2.18; 2.50 (0.09; 5.10)	2.18417	2.5	2.18417	2.5	0.091128	5.09699
HarvestIndex	Maximum ratio of seed biomass / above-ground biomass for a given plant at the end of life cycle	none									#N/A	#N/A	#N/A	#N/A						0	Harvest	0.35; 0.54 (0.00; 0.65)	0.35	0.54	0.35	0.54	0	0.65
HMearly	Plant height per above-ground plant biomass after emergence if no shading	cm/g	Unshaded crop plants are taller per unit per unit biomass, growing above weeds, increasign crop biomass production and shade cast on weeds				0.543221	0.456779			1	0.822622	0	1		0.0478993		0.00321488		0.0478993	Morphology	6.5; 25.5 (0.7; 217.7)	6.51392	25.5009	6.51392	25.5009	0.71	217.725
HMlate	Plant height per above-ground plant biomass during reproduction if no shading	cm/g	Unshaded crop plants are taller per unit per unit biomass, growing above weeds, increasign crop biomass production and shade cast on weeds								#N/A	#N/A	#N/A	#N/A						0	Morphology	15.6; 50.4 (3.5; 127.5)	15.6403	50.4476	15.6403	47.1555	3.45927	127.52
HMmid	Plant height per above-ground plant biomassduring vegetative stage if no shading	cm/g	Unshaded crop plants are taller per unit per unit biomass, growing above weeds, increasign crop biomass production and shade cast on weeds				1	0			#N/A	#N/A	1	0		0.022362				0.022362	Morphology	11.8; 22.2 (4.5; 162.7)	11.7552	22.156	11.7552	22.156	4.46445	162.74
k_coef	Extinction coefficient	none	Crop plants intercept more light and cast more shade onto weeds								#N/A	#N/A	#N/A	#N/A						0	Growth	0.77; 0.94 (0.50; 0.95)	0.765	0.935	0.85	0.85	0.5	0.95
l50	Time until the seedling reaches 50% of shootLength	°C days	Crop emergence is delayed, protecting spring-sown crops from frost and increasing herbicide efficiency (less "umbrella" effect)	Crop emergence is delayed, reducing crop growth duration					1	0	0.647727	0.352273	#N/A	#N/A			0.00305723	0.0052166		0.0052166	GerminationEmergence	54; 66 (35; 104)	54	66	60	60	35.1971	104
LA0	Initial leaf area at emergence	cm2	More light interception and biomass accumulation from the very first day onwards								#N/A	#N/A	#N/A	#N/A						0	Establishment	0.47; 3.98 (0.00; 3.10)	0.47039	3.97648	0.47039	3.97648	0.0019	3.1
lb	Shape parameter for pre-emergent shoot growth. The higher this value, the later the growth onset but the higher the growth speed	none	Crop emergence is faster. Crop plants are advantaged compared to weed plants	Crop emergence starts earlier (though it lasts for more days), allowing some crop plants to precede weed emergence					0.159574	1	#N/A	#N/A	#N/A	#N/A			0.00784196			0.00784196	GerminationEmergence	1.85; 2.26 (1.30; 3.40)	1.845	2.255	2.05	2.05	1.3	3.4
LBRearly	Leaf biomass ratio (leaf biomass/total above-ground biomass) after emergence if no shading	g/g	Crop plants have a larger light interception area, increasing crop biomass production and shade cast on weeds								#N/A	#N/A	#N/A	#N/A						0	Morphology	0.72; 0.83 (0.50; 1.00)	0.721333	0.825931	0.721333	0.825931	0.5	1
LBRlate	Leaf biomass ratio (leaf biomass/total above-ground biomass) during reproduction if no shading	g/g	Crop plants have a larger light interception area, increasing crop biomass production and shade cast on weeds		1	0	1	0	1	0	1	0.625	#N/A	#N/A	0.198594	0.0331259	0.00448298	0.00382726		0.198594	Morphology	0.27; 0.59 (0.00; 0.98)	0.269561	0.589211	0.269561	0.589211	0	0.98
LBRmid	Leaf biomass ratio (leaf biomass/total above-ground biomass) during vegetative stage if no shading	g/g	Crop plants have a larger light interception area, increasing crop biomass production and shade cast on weeds								0.857732	0.142268	#N/A	#N/A				0.00465305		0.00465305	Morphology	0.75; 0.82 (0.15; 1.00)	0.748169	0.818158	0.748169	0.818158	0.15	1
max_height	Maximum plant height	cm	Taller crop plants grow above weeds, increasint crop biomass production and shade cast on weeds, and this from emergence onwards				0.309735	1	0.291503	0.840426	0.528169	0.471831	#N/A	#N/A		0.0598331	0.00881089	0.00421921		0.0598331	Morphology	83; 181 (30; 250)	82.5	181	82.5	181	30	250
max_width	Maximum plant diameter	cm	Crop plants grow wider, increasing soil coverage and light interception, leaving less space/light for weeds		0.598772	0.66816					#N/A	#N/A	0	1	0.045134					0.045134	Morphology	69; 132 (30; 165)	69.3	132	69.3	132	30	165
mu_HMearly	Increase in plant height per biomass HM if shaded after emergence	none	Shaded crop plants increase their height per unit per unit biomass to grow above weeds, increasing crop biomass production and shade cast on weeds								#N/A	#N/A	#N/A	#N/A						0	ShadingResponse	-0.01; 0.20 (0.00; 1.09)	-0.0130927	0.201476	-0.0130927	0.201476	0	1.0876
mu_HMlate	Increase in plant height per biomass HM if shaded during reproduction	none	Shaded crop plants increase their height per unit per unit biomass to grow above weeds, increasing crop biomass production and shade cast on weeds								#N/A	#N/A	1	0.235585						0	ShadingResponse	0.24; 0.89 (-0.49; 2.27)	0.240449	0.889318	0.240449	0.889318	-0.489092	2.27314
mu_HMmid	Increase in plant height per biomass HM if shaded during vegetative stage	none	Shaded crop plants increase their height per unit per unit biomass to grow above weeds, increasing crop biomass production and shade cast on weeds		1	0	1	0	1	0	1	0	#N/A	#N/A	0.198594	0.0251465	0.0100076	0.00412673		0.198594	ShadingResponse	-0.30; 0.61 (0.00; 1.77)	-0.29506	0.610287	-0.29506	0.610287	0	1.77101
mu_LBRearly	Increase in leaf biomass ratio LBR if shaded after emergence	none	Shaded crop plants increase leaf area. Crop plants intercept more light, produce more biomass and cast more shade onto weeds				1	0			#N/A	#N/A	1	0.684211		0.034049				0.034049	ShadingResponse	-0.06; 0.02 (-0.41; 0.03)	-0.057709	0.022674	-0.057709	0.022674	-0.406077	0.029836
mu_LBRlate	Increase in leaf biomass ratio LBR if shaded during reproduction	none	Shaded crop plants increase leaf area. Crop plants intercept more light, produce more biomass and cast more shade onto weeds		1	0					1	0	0	1	0.141029			0.00412673		0.141029	ShadingResponse	-0.33; 0.12 (-0.62; 1.39)	-0.331674	0.124226	-0.331674	0.124226	-0.622667	1.38806
mu_LBRmid	Increase in leaf biomass ratio LBR if shaded during vegetative stage	none	Shaded crop plants increase leaf biomass. Crop plants intercept more light, produce more biomass and cast more shade onto weeds		1	0	1	0	1	0	#N/A	#N/A	#N/A	#N/A	0.035237	0.0267354	0.0108388			0.035237	ShadingResponse	-0.30; 0.01 (-0.66; 0.48)	-0.302567	0.0127302	-0.302567	0.0127302	-0.660404	0.481484
mu_RLHearly	Topward shift of leaf area along plant height when shaded after emergence	none	Shaded crop plants shift their leaf area topwards. Their leaf area is above the weeds, intercepting more light, producing more biomass and casting more shade onto weeds						1	0	#N/A	#N/A	0	1			0.00305723			0.00305723	ShadingResponse	-0.05; 0.06 (-0.63; 0.59)	-0.0523713	0.055469	-0.0523713	0.055469	-0.633942	0.592209
mu_RLHlate	Topward shift of leaf area along plant height when shaded during reproduction	none	Shaded crop plants shift their leaf area topwards. Their leaf area is above the weeds, intercepting more light, producing more biomass and casting more shade onto weeds								#N/A	#N/A	0.777191	0.222809						0	ShadingResponse	-0.07; 0.31 (-1.00; 1.39)	-0.0689837	0.314535	-0.0689837	0.314535	-0.999247	1.39496
mu_RLHmid	Topward shift of leaf area along plant height when shaded during vegetative stage	none	Shaded crop plants shift their leaf area topwards. Their leaf area is above the weeds, intercepting more light, producing more biomass and casting more shade onto weeds								0.653061	0.346939	#N/A	#N/A				0.00513903		0.00513903	ShadingResponse	-0.10; 0.31 (-1.00; 0.84)	-0.100553	0.306691	-0.100553	0.306691	-0.999247	0.835057
mu_SLAearly	Increase in specific leaf area SLA if shaded after emergence	none	Shaded crop plants increase leaf area per unit leaf biomass, increasing crop biomass production and shade cast on weeds								#N/A	#N/A	#N/A	#N/A						0	ShadingResponse	0.04; 0.13 (-0.48; 0.89)	0.0356444	0.129994	0.037486	0.129994	-0.47788	0.885417
mu_SLAlate	Increase in specific leaf area SLA if shaded during reproduction	none	Shaded crop plants increase leaf area per unit leaf biomass, increasing crop biomass production and shade cast on weeds		0.586108	0.413892					#N/A	#N/A	#N/A	#N/A	0.0548484					0.0548484	ShadingResponse	0.40; 0.85 (-0.10; 1.60)	0.40042	0.854663	0.40042	0.854663	-0.10395	1.60249
mu_SLAmid	Increase in specific leaf area SLA if shaded during vegetative stage	none	Shaded crop plants increase leaf area per unit leaf biomass, increasing crop biomass production and shade cast on weeds								#N/A	#N/A	0	1						0	ShadingResponse	0.10; 0.47 (-0.53; 1.41)	0.101438	0.470203	0.101438	0.470203	-0.526365	1.40894
mu_WMearly	Increase in plant width per biomass WM if shaded after emergence	none		Shaded crop plants increase their plant width (rather than their height) per unit biomass. They thus grow under the canopy rather than above weed plants, reducing crop biomass accumulation.and shade cast on weeds							#N/A	#N/A	0	1						0	ShadingResponse	-0.02; 0.09 (0.00; 0.48)	-0.0174533	0.094146	-0.0174533	0.094146	0	0.483065
mu_WMlate	Increase in plant width per biomass WM if shaded during reproduction	none		Shaded crop plants increase their plant width (rather than their height) per unit biomass. They thus grow under the canopy rather than above weed plants, reducing crop biomass accumulation.and shade cast on weeds	0.0137097	1					0.0708661	0.929134	#N/A	#N/A	0.127713			0.00385301		0.127713	ShadingResponse	-0.15; 0.83 (-0.45; 1.59)	-0.147042	0.832895	-0.147042	0.717366	-0.452453	1.58758
mu_WMmid	Increase in plant width per biomass WM if shaded during vegetative stage	none		Shaded crop plants increase their plant width (rather than their height) per unit biomass. They thus grow under the canopy rather than above weed plants, reducing crop biomass accumulation.and shade cast on weeds			1	0			#N/A	#N/A	#N/A	#N/A		0.0144291				0.0144291	ShadingResponse	-0.89; 0.30 (-0.64; 1.31)	-0.891759	0.302218	-0.891759	0.302218	-0.640032	1.31471
nonDormantMinimum.YOUNG_SEEDS.	Minimum proportion of non-dormant seeds when seeds < 1 year	seeds/seeds	More crop seeds germinate and emergence, increasing crop production and casting more shade onto weeds								#N/A	#N/A	1	0						0	GerminationEmergence	0.90; 1.00 (0.48; 1.00)	0.9	1	1	1	0.48	1
PeaFloweringTT	Time from plant emergence to flowering onset	°C days	More crop biomass is produced before reproduction sets in	A longer crop growth duration delays the harvest and leaves more time for the weeds to produce biomass inside the crop	1	0.0854783			0	1	0.954545	0.0454545	0.94863	1	0.19241		0.0116335	0.00690149		0.19241	Phenology	82; 2696 (434; 4701)	82	2696	846	4824	434	4701
propRootBM0	Proportion of plant biomass that is allocated to roots at early stages	g/g	A more voluminous crop root system leaves less water for weed seed germination and pre-emergent growth	A more voluminous crop root system leaves less above-ground biomass to crop plants, resulting in smaller crop plants and a reduced light interception area							#N/A	#N/A	#N/A	#N/A						0	Roots	0.17; 0.21 (0.11; 0.34)	0.17	0.206586	0.17	0.206586	0.11194	0.34173
r50	Time until the seedling reaches 50% of rootLength	°C days		The slower root growth during pre-emergent crop growth results in more crop seedling loss due to drought, leaving more space/light to weeds							0.27112	1	0.176575	0.823425				0.00288095		0.00288095	GerminationEmergence	101; 123 (19; 161)	100.693	122.613	100.693	122.613	19.108	160.76
rateCyl	Ratio of depth at which the root system extension is maximal/root system depth	cm/cm	A more voluminous crop root system leaves less water for weed seed germination and pre-emergent growth	A more voluminous crop root system leaves less above-ground biomass to crop plants, resulting in smaller crop plants and a reduced light interception area							0.72888	0.27112	#N/A	#N/A				0.00252425		0.00252425	Roots	0.07; 0.26 (0.00; 0.26)	0.0673	0.256	0.0673	0.256	0	0.256
rateDepth	Speed of root system depth extension	mm/day under optimal temperature	A more voluminous crop root system leaves less water for weed seed germination and pre-emergent growth	A more voluminous crop root system leaves less above-ground biomass to crop plants, resulting in smaller crop plants and a reduced light interception area					0.904762	0.0952381	0.27112	0.72888	#N/A	#N/A			0.01024	0.00252425		0.01024	Roots	11; 15 (8; 19)	10.5	15.3	10.5	15.3	8.33	18.5703
rateWidth	Speed of root system width extension	mm/day under optimal temperature	A more voluminous crop root system leaves less water for weed seed germination and pre-emergent growth	A more voluminous crop root system leaves less above-ground biomass to crop plants, resulting in smaller crop plants, a reduced light interception area and less shade cast onto weeds					1	0	#N/A	#N/A	#N/A	#N/A			0.00596415			0.00596415	Roots	#NAME?	4.04	6	4.04	6	3.76	<
rb	Shape parameter for pre-emergent root growth. The higher this value, the later the growth onset but the higher the growth speed	none	Pre-emergent crop root elongation starts earlier, thus reducing crop seedling loss due to early drought	Pre-emergent crop root elongation finishes earlier, thus reducing crop seedling loss due to late drought			1	0	1	0	#N/A	#N/A	0	1		0.0600931	0.00305723			0.0600931	GerminationEmergence	1.24; 1.52 (1.24; 1.52)	1.242	1.518	1.38	1.38	1.242	1.518
RBR	Proportion of plant biomass that is allocated to roots	g/g	A more voluminous crop root system leaves less water for weed seed germination and pre-emergent growth	A more voluminous crop root system leaves less above-ground biomass to crop plants, resulting in smaller crop plants and a reduced light interception area			0	1			#N/A	#N/A	#N/A	#N/A		0.00953638				0.00953638	Roots	0.17; 0.21 (0.11; 0.34)	0.17	0.206586	0.17	0.206586	0.11194	0.34173
reductionDepth	Reduction in germination with seed depth	seeds∙seeds-1·cm-1		Germination of buried crop seeds decreases, reducing crop emergence and leaving more space/light to weeds	0	1			0	1	#N/A	#N/A	#N/A	#N/A	0.0550639		0.00596415			0.0550639	GerminationEmergence	0.0006; 0.0009 (0.0003; 0.02)	0.000587	0.000913	0.000587	0.000913	0.000305	0.016551
reductionSurface	Reduction in germination if seed is on soil surface	seeds/seeds		Germination of surface crop seeds decreases, reducing crop emergence and leaving more space/light to weeds					0	1	#N/A	#N/A	0.113544	0.886456			0.00305723			0.00305723	GerminationEmergence	0.49; 0.59 (0.54; 0.76)	0.486	0.594	0.54	0.54	0.54	0.76
RGR	Relative growth rate after emergence	cm2/°Cday	Crop plants grow faster after emergence, producing more leaf area and biomass, and shading weeds more		0.739927	0.260073					0	1	#N/A	#N/A	0.0068667			0.00149908		0.0068667	Establishment	0.01; 0.03 (0.01; 0.06)	0.00935	0.02696	0.00935	0.02696	0.009355	0.05925
RLHearly	Relative leaf area height (relative plant height below which 50% of leaf area are located) after emergence if no shading	cm/cm	Crop leaf area is concentrated at the top of unshaded crop plants which thus shade smaller weeds more	Crop leaf area is concentrated toward the top of the crop plants, increasing self shading, thus reducing light interception and biomass accumulation of the crop	0	1			0.34585	0.65415	#N/A	#N/A	#N/A	#N/A	0.0469569		0.00577362			0.0469569	Morphology	0.48; 0.62 (0.27; 0.81)	0.478932	0.620728	0.478932	0.620728	0.26613	0.80506
RLHlate	Relative leaf area height (relative plant height below which 50% of leaf area are located) during reproduction if no shading	cm/cm	Crop leaf area is concentrated at the top of unshaded crop plants which thus shade smaller weeds more	Crop leaf area is concentrated toward the top of the crop plants, increasing self shading, thus reducing light interception and biomass accumulation of the crop							#N/A	#N/A	#N/A	#N/A						0	Morphology	0.46; 0.61 (0.20; 0.75)	0.458124	0.612334	0.473368	0.612334	0.201088	0.753418
RLHmid	Relative leaf area height (relative plant height below which 50% of leaf area are located) during vegetative stage if no shading	cm/cm	Crop leaf area is concentrated at the top of unshaded crop plants which thus shade smaller weeds more	Crop leaf area is concentrated toward the top of the crop plants, increasing self shading, thus reducing light interception and biomass accumulation of the crop					0	1	0.4375	0.5625	#N/A	#N/A			0.00357175	0.00284347		0.00357175	Morphology	0.44; 0.58 (0.27; 0.77)	0.44024	0.580853	0.44024	0.580853	0.26613	0.77194
rootLength	Maximum root length during pre-emergent seedling growth	mm	Drought kills fewer crop seedlings during preemergent growth								#N/A	#N/A	#N/A	#N/A						0	GerminationEmergence	55; 65 (13; 83)	54.7989	65.1884	54.7989	65.1884	12.6634	82.7684
se_LA	Standard-deviation of initial post-emergence leaf area	cm2		Variability in initial crop leaf area results in a heterogeneous crop canopy	0.673477	0.326523			1	0	#N/A	#N/A	#N/A	#N/A	0.0124082		0.00357175			0.0124082	Establishment	0.39; 1.96 (0.02; 1.73)	0.390663	1.96144	0.390663	1.96144	0.01685	1.7282
seedWeight	Weight of one seed	mg	Fewer crop seedlings die during pre-emergent growth and initial post-emergence growth is faster, leaving less space/light to weeds								0	1	1	0				0.00323766		0.00323766	GerminationEmergence	103; 187 (0.7; 426.0)	102.766	187	102.766	187	0.657625	426
shapeHI	Sensitivity of harvest index to above-ground plant biomass. If clsoe to 1, harvest index does not depend on biomass. The closer to 0, the more seed biomasse light plants produce relatively compared to heavy plants	none									#N/A	#N/A	#N/A	#N/A						0	Harvest	0.90; 1.10 (0.91; 1.00)	0.9	1.1	1	1	0.907	1
shootDiameter	Shoot diameter during pre-emergent shoot growth	mm	Lower pre-emergent seedling mortality in buried crop seeds				1	0	1	0	#N/A	#N/A	1	0		0.0578437	0.00305723			0.0578437	GerminationEmergence	1.98; 2.42 (0.44; 2.20)	1.98	2.42	2.2	2.2	0.443109	2.2
shootLength	Maximum shoot length during pre-emergent seedling growth	mm	Lower pre-emergent seedling mortality in buried crop seeds		0.747494	0.482858			0.588235	0.411765	0	1	0.685714	0.823425	0.0393532		0.00268228	0.00299438		0.0393532	GerminationEmergence	364; 438 (72; 565)	363.602	437.748	363.602	437.748	72	565.029
SLAearly	Specific Leaf Area SLA after emergence if no shading	cm2/g	Unshaded crop plants have a larger leaf area per leaf biomass, intercepting more light, thus increasing crop biomass production and shade cast on weeds						1	0	1	0	0.676329	0.323671			0.00357175	0.00231261		0.00357175	Morphology	180; 383 (58; 1928)	179.836	383.143	179.836	383.143	58.0318	1928.05
SLAlate	Specific Leaf Area SLA during reproduction if no shading	cm2/g	Unshaded crop plants have a larger leaf area per leaf biomass, intercepting more light, thus increasing crop biomass production and shade cast on weeds								#N/A	#N/A	#N/A	#N/A						0	Morphology	59; 140 (0; 450)	58.6055	139.691	58.6055	138.265	0	450
SLAmid	Specific Leaf Area SLA during vegetative stage if no shading	cm2/g	Unshaded crop plants have a larger leaf area per leaf biomass, intercepting more light, thus increasing crop biomass production and shade cast on weeds								#N/A	#N/A	#N/A	#N/A						0	Morphology	140; 248 (44; 804)	140.004	248.072	140.004	248.072	43.5328	804.1
soilPen	Resistance to soil compaction (0=none, 1=total)	cm/cm		The crop root system expands slowlier, leaving more biomass for above-ground exploration, light interception and shade cast on weeds							#N/A	#N/A	#N/A	#N/A						0	Roots	0.82; 1.00 (0.82; 1.00)	0.819	1	0.819	1	0.823	1
t0	Plant age when root system starts to grow	Days under optimal temperature	The crop root system expands slowlier after emergence, pulling less biomass out of above-ground plant biomass. Crop plants can thus intercept more light and shade weesd more	A more voluminous crop root system leaves less water for weed seed germination and pre-emergent growth					0.062069	0.937931	#N/A	#N/A	#N/A	#N/A			0.00600735			0.00600735	Roots	0.00; 7.70 (0.00; 0.00)	0	7.7	0	7.7	0	0
t0Cyl	Lag time from root-system growth onset to when the cylinder-shaped part at the top of the root volume starts to grow in height	Days under optimal temperature	The crop root system expands slowlier, leaving more biomass for above-ground exploration, light interception and shade cast on weeds	A more voluminous crop root system leaves less water for weed seed germination and pre-emergent growth							#N/A	#N/A	#N/A	#N/A						0	Roots	21; 37 (20; 38)	21	37.2	21	37.2	20	38
tFrostEarly1	Temperature at which plant biomass loss due to frost starts after emergence	°C		Crop plants lose more biomass to frost after emergence, leaving more space and light to weeds							#N/A	#N/A	#N/A	#N/A						0	Frost	-4.2; -3.8 (-13.0; 0.0)	-4.21837	-3.77097	-4	-4	-13	0
tFrostEarly2	Temperature at which at plants start to die because of frost after emergence	°C		Frost kills crop plants more often after emergence, levaing more space and light to weeds							0	1	#N/A	#N/A				0.00149908		0.00149908	Frost	-8.5; -7.5 (-15.0; 0.0)	-8.48052	-7.51869	-8	-8	-15	0
tFrostEarly3	Temperature killing all plants die because of frost, after emergence	°C		Frost kills crop plants more often after emergence, which reduces their own growth and leaves more space and light for the weeds							0.208333	0.791667	#N/A	#N/A				0.00426208		0.00426208	Frost	-12.9; -10.9 (-25.0; -5.0)	-12.8553	-10.9272	-12	-12	-25	-5
tFrostLate1	Temperature at which plant biomass loss due to frost starts during reproduction	°C		Crop plants lose more biomass or flower to frost during reproduction, leaving more space and light to weeds							#N/A	#N/A	#N/A	#N/A						0	Frost	-1.0; 1.0 (-6.9; 4.0)	-1	1	0	0	-6.9	4
tFrostLate2	Temperature at which at plants start to die because of frost during reproduction	°C		Frost kills crop plants more often during reproduction stage, levaing more space and light to weeds							#N/A	#N/A	#N/A	#N/A						0	Frost	-2.2; -1.8 (-11.0; 0.0)	-2.2	-1.8	-2	-2	-11	0
tFrostLate3	Temperature killing all plants die because of frost, during reproduction	°C		Frost kills crop plants more often during reproduction, which reduces their own growth and leaves more space and light for the weeds							#N/A	#N/A	#N/A	#N/A						0	Frost	-4.4; -3.6 (-25.0; -5.0)	-4.4	-3.6	-4	-4	-25	-5
tFrostMid1	Temperature at which plant biomass loss due to frost starts during vegetative growth	°C		Crop plants lose more biomass to frost during vegetative stage, leaving more space and light to weeds							#N/A	#N/A	#N/A	#N/A						0	Frost	-15.0; -6.5 (-13.0; -0.5)	-15	-6.5	-15	-6.5	-13	-0.5
tFrostMid2	Temperature at which at plants start to die because of frost during vegetative growth	°C		Frost kills crop plants more often during vegetative stage, levaing more space and light to weeds							#N/A	#N/A	0.0811808	0.918819						0	Frost	-20.0; -11.5 (-20.0; -4.0)	-20	-11.5	-20	-11.5	-20	-4
tFrostMid3	Temperature killing all plants die because of frost, during vegetative stage	°C		Frost kills crop plants more often, which reduces their own growth and leaves more space and light for the weeds			0	1	0	1	0	1	#N/A	#N/A		0.00811916	0.00323972	0.00150228		0.00811916	Frost	-25.0; -16.5 (-25.0; -5.0)	-25	-16.5	-25	-16.5	-25	-5
tPhoto1	Temperature at which photosynthesis starts	°C		Crop photosynthesis needs warmer days to start, delaying and slowing down crop growth, leaving more space and light for weeds					1	0	#N/A	#N/A	#N/A	#N/A			0.00357175			0.00357175	Growth	0.0; 1.1 (0.0; 10.0)	0	1.1	0	1.1	0	10
tPhoto2	Temperature above which net photosynthesis is maximum	°C		Maximum crop photosynthesis rate is reached only on hot days, reducing crop biomass production	0	1			0	1	0	1	#N/A	#N/A	0.197537		0.00805299	0.00555107		0.197537	Growth	15; 27 (10; 30)	15	27	15	27	10	30
tPhoto3	Temperature below which net photosynthesis is maximum	°C	Heat does not slow down crop photosynthesis, producing more crop biomass								#N/A	#N/A	#N/A	#N/A						0	Growth	20; 30 (15; 32)	20	30	20	30	15	32
tPhoto4	Temperature above which photosynthesis stops	°C	Crop photosynthesis is possible even on very hot days, producing more crop biomass and thus casting more shade onto weeds		0.0382268	0.961773			1	0	1	0	#N/A	#N/A	0.0279521		0.00357175	0.00150228		0.0279521	Growth	30; 34 (27; 45)	30	33.5	30	33.5	27	45
TTcot	Duration of cotyledon stage	°C days	Biomass accumulation goes on for longer	Crop shading response is delayed	0.381813	0.618187					#N/A	#N/A	#N/A	#N/A	0.0563733					0.0563733	Phenology	40; 83 (22; 180)	39.5	83.01	39.5	83.01	22.08	180
TTflo	Duration of flowering stage	°C days	Biomass accumulation goes on for longer	Crop maturity starts later	0.532991	0.747494					0	1	#N/A	#N/A	0.0400267			0.00261266		0.0400267	Phenology	400; 950 (51; 1180)	400	950	400	950	51	1180
TTmat	Duration of maturation	°C days	Biomass accumulation goes on for longer	Full maturity is delayed							#N/A	#N/A	#N/A	#N/A						0	Phenology	490; 670 (100; 16000)	490	670	490	670	100	16000
TTplant	Duration of plantlet stage	°C days	Biomass accumulation goes on for longer	Crop shading response is delayed							0	1	#N/A	#N/A				0.010295		0.010295	Phenology	40; 83 (22; 200)	39.5	83.01	39.5	83.01	22.08	200
WMearly	Plant width per above-ground plant biomass after emergence if no shading	cm/g	Unshaded crop plants are wider per unit biomass, intercepting more light, increasing crop biomass production and shade cast on smaller weeds	Unshaded crop plants are wider per unit biomass and more prone to be shaded by taller neighbour plants and more exposed to damage by mechanical weeding	0	1					0	1	#N/A	#N/A	0.199715			0.00412673		0.199715	Morphology	4.31; 66.18 (0.01; 100.00)	4.30605	66.179	4.30605	66.179	0.01	100
WMlate	Plant width per above-ground plant biomassduring reproduction if no shading	cm/g	Unshaded crop plants are wider per unit biomass, intercepting more light, increasing crop biomass production and shade cast on smaller weeds	Unshaded crop plants are wider per unit biomass and more prone to be shaded by taller neighbour plants and more exposed to damage by mechanical weeding			1	0			#N/A	#N/A	#N/A	#N/A		0.0310134				0.0310134	Morphology	9.26; 23.49 (3.60; 217.81)	9.26498	23.4854	9.26498	23.4854	3.60352	217.812
WMmid	Plant width per above-ground plant biomassduring vegetative stage if no shading	cm/g	Unshaded crop plants are wider per unit biomass, intercepting more light, increasing crop biomass production and shade cast on smaller weeds	Unshaded crop plants are wider per unit biomass and more prone to be shaded by taller neighbour plants and more exposed to damage by mechanical weeding			1	0	1	0	#N/A	#N/A	1	0		0.00991129	0.00839169			0.00991129	Morphology	9.80; 29.45 (3.55; 106.35)	9.79533	29.4478	9.79533	29.4478	3.55	106.35

## Sheet: E.7 - ExplainTechniques
Table E.7. Biophysical reasons for the effects of pea management techniques on potential yield and weed (dys)services identified with classification and regression trees analysing weed (dis)service indicators as a function of situation, pea parameters, pea management techniques and other-crop management techniques and summarized in section E.3 of the present excel file.
In italic, only concern potential yield			Explanation of pea technique effect on cropping-system performance		Harmfulness indicators				Biodiversity indicators
Illogical			Potential yield		Control 0 = highest yield loss, highest field infesetation				0 = lowest bee food offer
			Yield loss control		Control 1 = lowest yield loss, lowest field infestation				1 = higheest bee food offer
			Field infestation control
			Increased	Decreased	Probability that									Type of technique	Mim-max values in data set
Pea technique			Bee food score		Potential yield		Yield loss control		Field infestation control		Bee food
Name	Meaning	Unit	Decreased	Increased	Increased	Decreased	Increased	Decreased	Increased	Decreased	Decreased	Increased
BarleyBefore_POIS	Crop before pea is barley	1 (yes) or 0 (no)				#N/A			#N/A	#N/A	#N/A	#N/A		Rotation	0 or 1
bRolling_POIS	Rolling operations per year	Number per year	Improves soil-seed contact, improving crop germination and emergence, causing fatal weed seed germination during summer fallow		1	0			#N/A	#N/A	#N/A	#N/A		Tillage	0; 4
EfficacyDicot._POIS	Total mortality of dicot weeds due to herbicides	[0,1]	Fewer weeds survive			#N/A			#N/A	#N/A	1	0.344828		Herbicide	0; 1
EfficacyMonocot_POIS	Total mortality of monocot weeds due to herbicides	[0,1]	Fewer weeds survive			#N/A			1	0.00631222	#N/A	#N/A		Herbicide	0; 1
FreqLeavingCutCropBiomass_POIS	Pea leaves and stems were left in field after harvest	1 (yes) or 0 (no)	Hinders weed emergence after harvest	Leaves harvested weed seeds in filed		#N/A	1	0	0.407608	0.592392	1	0		Mowing/Shredding	0; 0.8
Frequency_POIS	Frequency of pea crops in rotation	[0,1]	Pea growing season inadequate for emergence and reproduction of many weeds	Pea is less competitive against weeds than other crops		#N/A	0	1	1	1	0.179222	0.820778		Mowing/Shredding	0.16; 0.50
harvestDate_POIS	Harvest date	Julian days	Leaves more time for crop biomass accumulation	Leaves more time for weeds to grow and reproduce										Harvest	7 Jun; 15 Aug
Interrow.cm._POIS	Interrow width if row sowing	cm	More crop damage by mechanical weeding in smaller interrows	More competition between plants inside a given row, more light unintercepted by crops inside interrow	0.165179	1	0	1	#N/A	#N/A	#N/A	#N/A		Sowing	4; 52
MaizeBefore_POIS	Crop before pea is maize	1 (yes) or 0 (no)				#N/A			#N/A	#N/A	#N/A	#N/A		Rotation	0 or 1
MaxTillageDepth_POIS	Maximum tillage depth	cm	Buries more weed seeds, reducing weed seed germination and emergence	Stimulates weed seed germination and emergence of excavated weed seeds	0.681818	1	1	0.830495	0.228041	0.935928	0.911416	1		Tillage	0; 29
meanMechWeedDepth.cm._POIS	Mean depth of mechanical weeding	cm				#N/A	1	0	#N/A	#N/A	#N/A	#N/A		MechWeeding	1; 7
meanMechWeedSpeed.km.h._POIS	Mean tractor speed during mechanical weeding	km/h	Uproots more weed seedlings		0.114441	0.885559	0.908397	0.0916031	#N/A	#N/A	0.6875	0.3125		MechWeeding	3; 15
MeanTillageDepth_POIS	Tillage depth averaged over all tillage operations (excluding rolling and shredding)	cm	Buries more weed seeds, reducing weed seed germination and emergence	Stimulates weed seed germination and emergence of excavated weed seeds	1	1	1	0.780965	0.89755	0.890453	0.753846	1		Tillage	0; 20
nbFallowHerbicides_POIS	Herbicides during summer fallow preceding pea	Number per year				#N/A			#N/A	#N/A	#N/A	#N/A		Herbicide	0; 1
nbFoliarHerbicides_POIS	Foliar herbicides (entering via leaves)	Number per year				#N/A			#N/A	#N/A	#N/A	#N/A		Herbicide	0; 3
nbHerbDicotSup50_POIS	Herbicides whose efficiency on dicot weeds > 50%	Number per year				#N/A			#N/A	#N/A	0.208861	0.791139		Herbicide	#N/A
nbHerbDicotSup75_POIS	Herbicides whose efficiency on dicot weeds > 75%	Number per year				#N/A	1	0	1	0	#N/A	#N/A		Herbicide	#N/A
nbHerbicides_POIS	Herbicides (during fallow and on crop)	Number per year				#N/A			1	0	#N/A	#N/A		Herbicide	0; 4
nbHerbMonocotSup50_POIS	Herbicides whose efficiency on monocot weeds > 50%	Number per year	Fewer grass weeds survive			#N/A	0.955414	0.044586	#N/A	#N/A	#N/A	#N/A		Herbicide	#N/A
nbHerbMonocotSup75_POIS	Herbicides whose efficiency on monocot weeds > 75%	Number per year	Fewer grass weeds survive	Leaves more space/resources to dicot weeds		#N/A			1	0	#N/A	#N/A		Herbicide	#N/A
nbIncropHerbicides_POIS	Herbicides sprayed on crop	Number per year				#N/A			1	0	#N/A	#N/A		Herbicide	0; 4
nbIrrigation_POIS	Irrigation	Number per year				#N/A			#N/A	#N/A	#N/A	#N/A		Irrigation	0; 7
nbMechWeeding_POIS	Mechanical weeding operations	Number per year	Destroys weed plants inside the crop	Triggers germination of late-emerging weeds	1	1	1	0	#N/A	#N/A	#N/A	#N/A		MechWeeding	0; 5
nbMultiHerbicides_POIS	Multi-entry herbicides (at least two entry modes among leaves, roots and meristem)	Number per year				#N/A			0.434783	0.565217	#N/A	#N/A		Herbicide	0; 4
nbNonSystemicHerbicides_POIS	Non-systemic herbicides	Number per year				#N/A			#N/A	#N/A	#N/A	#N/A		Herbicide	0; 4
nbPloughing_POIS	Mouldboard ploughing	Number per year	Buries weed seeds, reducing weed seed germination and emergence	Stimulates weed seed germination and emergence of excavated weed seeds	1	0			#N/A	#N/A	#N/A	#N/A		Tillage	0; 4
nbPseudorootHerbicides_POIS	Pseudo-root herbicides (entering via shoot meristem during emergence)	Number per year				#N/A			#N/A	#N/A	#N/A	#N/A		Herbicide	0; 3
nbResidueShredding.Broyage._POIS	Residue shredding during summer fallow	Number per year	Destroys weeds during summer fallow when they are most important for feeding bees			#N/A	1	0	0.407608	0.592392	1	0		Mowing/Shredding	0; 2
nbRolling_POIS	Rolling operatations during summer fallow or after sowing	Number per year				#N/A			#N/A	#N/A	#N/A	#N/A		Tillage	0; 4
nbRootHerbicides_POIS	Root-entering herbicides	Number per year				#N/A			#N/A	#N/A	#N/A	#N/A		Herbicide	0; 3
nbSuperficialTillage_POIS	Superficial tillage (disregarding rolling)	Number per year	Empties weed seed bank by stimulating germination during summer fallow ("false seed bed technique"), destroys weed plants prior to crop sowing	Stimulates weed seed germination and emergence of excavated weed seeds which can emergence after crop sowing	1	1	0.949187	0.050813	0.819457	0.647059	1	0.047619		Tillage	0; 10
nbSystemicHerbicides_POIS	Systemic herbicides	Number per year				#N/A			#N/A	#N/A	#N/A	#N/A		Herbicide	0; 4
OSRbefore_POIS	Crop before pea is oilseed rape	1 (yes) or 0 (no)				#N/A			#N/A	#N/A	#N/A	#N/A		Rotation	0 or 1
PrimaryCropSowingDate_POIS	Sowing date	Julian days	Leaves more time for false seed bed techniques; shortens the time during which weeds can grow inside the crop	Shortens the crop growth duration	0.851304	0.989724	0.674706	1	0.436275	1	0.596125	1		Sowing	1 Oct; 15 Apr
propSpeciesMortSup80_POIS	Proportion of weed species whose mortality due to herbicides exceeds 80%					#N/A	0.83908	0.16092	#N/A	#N/A	1	0		Herbicide	#N/A
propSpeciesMortSup90_POIS	Proportion of weed species whose mortality due to herbicides exceeds 90%					#N/A			#N/A	#N/A	#N/A	#N/A		Herbicide	#N/A
propWeededArea_POIS	Mechanically weeded field area	Proportion [0,1]	More weeds are destroyed	More damage to crop	0.36036	0.906459	1	1	#N/A	#N/A	0.345178	0.654822		MechWeeding	#N/A
RowSowing.1or0._POIS	Row sowing instead of broadcast sowing	1 (yes) or 0 (no)		Crop plant location is less uniform if low density and/or large interrow	0	1			#N/A	#N/A	#N/A	#N/A		Sowing	61% yes
shreddingHeight_POIS	Height of shredding operation during summer fallow	cm				#N/A			#N/A	#N/A	#N/A	#N/A		Mowing/Shredding	0; 0
SowingDensity.seeds.m2._POIS	Sowing density	seeds/m²	More crop plants and leaf area to produce crop biomass and shade weeds	Crop-crop competition can hinder crop biomass production in very high crop densities	1	0.105505	0.184028	0.815972	1	0.457008	0.930808	0.937398		Sowing	25; 115
SowingDepth.cm._POIS	Sowing depth	cm	Delays crop sowing, protects spring-sown pea from late frosts	More crop seedling loss during emergence and later emergence, leaving more space and light for weesd	0	1			#N/A	#N/A	0.148479	0.851521		Sowing	0; 5
summerPlough_POIS	Mouldboard ploughing April-October	1 (yes) or 0 (no)		Stimulates for weed germination and emergence after crop sowing if tillage occurs close to crop sowing		#N/A			#N/A	#N/A	#N/A	#N/A		Tillage	0; 1
summerTillage_POIS	Superficial tillage during April-October	1 (yes) or 0 (no)	Buries more weed seeds, reducing weed seed germination and emergence	Stimulates for weed germination and emergence after crop sowing if tillage occurs close to crop sowing		#N/A			#N/A	#N/A	#N/A	#N/A		Tillage	0; 9
SunflowerBefore_POIS	Crop before pea is sunflower	1 (yes) or 0 (no)				#N/A			#N/A	#N/A	#N/A	#N/A		Rotation	#N/A
timeHarvest1stPlough_POIS	Time from previous harvest to ploughing	days			1	0			#N/A	#N/A	#N/A	#N/A		Tillage	#N/A
timeHarvest1stRoll_POIS	Time from previous harvest to first rolling operation	days		Leaves less time false seed bed effects, increases risk of germinating weeds emerging after crop sowing date	0	1			#N/A	#N/A	0	1		Tillage	#N/A
timeHarvest1stShredding_POIS	Time from previous harvest to first shredding operation	days				#N/A			#N/A	#N/A	#N/A	#N/A		Mowing/Shredding	#N/A
timeHarvest1stTill_POIS	Time from previous harvest to first tillage operation	days	More time for weed seeds to be imbibed by rain on soil surface and getting more sensitive to false seed bed operations	Leaves more time for summer annuals to grow before destroying them. Less time to till frequently, larger risk of triggered weed seed germinations resulting in weeds emerging after crop sowing	0.68254	0.31746	0.552795	0.871465	0.856115	0.976979	0.362438	0.908881		Tillage	1; 285
timeLastHerbicideHarvest_POIS	Time from last herbicide to crop harvest	days	Earlier treatments are more efficient as weeds are still smaller and the canopy less dense	No treatments when weeds flower		#N/A			0.777595	0.222405	1	0.428673		Herbicide	1; 289
timeLastIrrigationHarvest_POIS	Time from last irrigation to crop harvest	days				#N/A			#N/A	#N/A	1	0		Irrigation	#N/A
timeLastMechWeedingHarvest_POIS	Time from last mechanical weeding to crop harvest	days	Crop is less damaged by late mechanical weeding	Late emerging weeds are also affected	1	0			#N/A	#N/A	#N/A	#N/A		MechWeeding	1; 290
timeLastPloughSow_POIS	Time from ploughing to crop sowing	days	Lower risk of triggered weed seed germinations emerging after crop sowing; leaves more time for false seed bed techniques targeting uncovered weed seeds.	Leaves more time for weeds to reinfest the field after the ploughing operation cleaned out all weeds	1	0			#N/A	#N/A	0.852878	0.147122		Tillage	#N/A
timeLastRollSow_POIS	Time from last rolling operation to crop sowing	days	Lower risk of triggered weed seed germinations emerging after crop sowing	Longer disturbance-free period	0	1	0	1	#N/A	#N/A	#N/A	#N/A		Tillage	5; 197
timeLastShreddingSow_POIS	Time from last shredding opration to crop sowing	days				#N/A			#N/A	#N/A	#N/A	#N/A		Mowing/Shredding	#N/A
timeLastTillSow_POIS	Time from last tillage to crop sowing	days	Lower risk of triggered weed seed germinations emerging after crop sowing	Leaves more time for weeds to reinfest the field after the last tillage operation cleaned out all weeds	1	0.662121	0.0510783	1	0	1	0.278689	0.980185		Tillage	0; 127
timeSow1stHerbicide_POIS	Time from sowing to 1st herbicide spraying	days	Earlier treatments miss later emerging weeds	Later treatments are less efficient and early emerging weeds have already hindered crop growth		#N/A	0.19352	0.927083	0.707811	0.381166	#N/A	#N/A		Herbicide	1; 294
timeSow1stIrrigation_POIS	Time from sowing to 1st irrigation	days	Irrigation does not increase weeds emerging together with crop			#N/A			#N/A	#N/A	#N/A	#N/A		Irrigation	#N/A
timeSow1stMechWeeding_POIS	Time from sowing to 1st mechanical weeding	days				#N/A	0	1	0.0203931	0.979607	#N/A	#N/A		MechWeeding	1; 278
totalIrrigaton.mm.ha._POIS	Amount of irrigated water	mm				#N/A			#N/A	#N/A	#N/A	#N/A		Irrigation	#N/A
WheatBefore_POIS	Crop before pea is winter wheat	1 (yes) or 0 (no)			0	1			#N/A	#N/A	#N/A	#N/A		Rotation	0 or 1
winterPlough_POIS	Mouldboad ploughing November-March	1 (yes) or 0 (no)		Means spring sowing or very late winter sowing, shortening the crop duration and crop biomass accumulation	1	0			0	1	#N/A	#N/A		Tillage	0; 1
winterTillage_POIS	Tillage during November-March	1 (yes) or 0 (no)	Means spring sowing or very late winter sowing, leaving more time for false seed bed techniques and shortening the crop duration, i.e. the time during which weeds can grow inside the crop	Means spring sowing or very late winter sowing, shortening the crop duration and crop biomass accumulation	0	1	0.903096	0.0969037	0	1	#N/A	#N/A		Tillage	0; 5
